# 1 Importation models for travel-related SARS-CoV-2 cases reported in 2 Newfoundland and Labrador during the COVID-19 pandemic

3 Zahra Mohammadi<sup>1</sup>, Monica Cojocar<sup>1</sup>, Julien Arino<sup>2</sup>, Amy Hurford<sup>3\*</sup>

4 <sup>1</sup>Department of Mathematics and Statistics, University of Guelph, Guelph, N1G 2W1, ON, Canada.

5 <sup>2</sup>Department of Mathematics, University of Manitoba, Winnipeg, R3T 2N2, MB, Canada.

6 <sup>3</sup>Department of Mathematics and Statistics, Biology Department, Memorial University of  
7 Newfoundland, St. John's, A1C 5S7, NL, Canada.

8 \*Corresponding author(s). E-mail(s): [ahurford@mun.ca](mailto:ahurford@mun.ca);

9 Contributing authors: [zaahra.mohammadi@gmail.com](mailto:zaahra.mohammadi@gmail.com); [mcojocar@uoguelph.ca](mailto:mcojocar@uoguelph.ca);  
10 [Julien.Arino@umanitoba.ca](mailto:Julien.Arino@umanitoba.ca);

## 11 Abstract

12 During the COVID-19 pandemic, the World Health Organization (WHO) updated guidelines advising that a  
13 risk-assessment framework considering local epidemiology and health services capacity be used to determine if  
14 travel measures should be implemented. Data, analysis, and models are needed to support these updated WHO  
15 guidelines. In 2020 and 2021, the Canadian province of Newfoundland and Labrador (NL) implemented travel  
16 measures that affected most travelers, including non-residents of NL, and NL residents that work outside the  
17 province. We used multiple data sources to estimate the total travel volume arriving in NL before and during the  
18 pandemic. We found that during the pandemic, travel to NL decreased by 82%, and the percentage of travelers  
19 arriving from given origins changed with Québec decreasing from 14 to 4%, and Alberta increasing from 7  
20 to 17%. We formulated an importation model including many epidemiological details, however, a less detailed  
21 statistical model considering the product of infection prevalence and travel volume for each Canadian province  
22 and the territories better predicted daily travel-related cases of Canadian origin ( $R^2 = 0.55$ ). We conclude that  
23 the accuracy of importation models are limited more by data availability, particularly travel-related case data,  
24 and data quality, particularly between-country differences in infection reporting, than by the complexity and  
25 details of importation models. Our results are evidence that will inform future risk-assessment frameworks to  
26 support travel measure implementation decisions during public health emergencies.

27 **Keywords:** Importation, travel measures, SARS-CoV-2, Newfoundland and Labrador, travel-related cases, COVID-19,  
28 pandemic

## 29 1 Introduction

30 On January 31, 2020, due to an outbreak of SARS-CoV-2 in Wuhan, China the World Health Organization (WHO)  
31 advised other countries to expect SARS-CoV-2 cases and be prepared for outbreak containment, but measures that

would restrict travel and trade were explicitly not recommended (Grépin et al, 2021; World Health Organization, 2020d). State Parties were to notify WHO within 48 hours of the public health rationale and justification of measures that would significantly interfere with international traffic (World Health Organization, 2020d). Despite broad consensus prior to the pandemic that during a public health emergency travel measures significantly impacting travel and trade should not be implemented, during the initial phase of the COVID-19 pandemic most countries implemented such travel measures (Grépin et al, 2021; Piccoli et al, 2022; Shoichet, 2020). The next two years saw substantial variation in the implementation and strictness of travel measures between (Piccoli et al, 2022) and within (Reddy et al, 2021; Studdert et al, 2020) countries. In July 2021, WHO provided updated recommendations stating that international travel-related measures should be ‘proportionate to the public health risk’ and adapted to a country’s ‘specific epidemiological, health system and socioeconomic context’ and recommended a risk-based approach (World Health Organization, 2021).

The unprecedented implementation of travel measures during the initial phase of the COVID-19 pandemic may have been because COVID-19 was more challenging to detect and contain than H1N1 influenza A (Anderson et al, 2020; Grépin et al, 2021). The inconsistent implementation of travel measures during the first two years of the pandemic may have been due to the low quality of evidence to support policy. Systematic reviews (Burns et al, 2021; Grépin et al, 2021) report that travel measures may have had a positive impact on infectious disease outcomes and reduced and delayed imported SARS-CoV-2 cases from Wuhan, but that overall the quality of evidence was low. Most evidence was due to modelling studies with a lack of ‘real world’ data (Burns et al, 2021), with inconsistent parameter estimates and assumptions, and that overlooked the impact of undetected cases outside of China (Grépin et al, 2021). Guidelines that recommended against the implementation of travel measures may have been made when considering travel measures in isolation, and might not be robust when considering the coordinated implementation of both travel measures and community non-pharmaceutical interventions as occurs for an elimination strategy (Grépin et al, 2023; Martignoni et al, 2023).

Several studies have combined air travel volumes, SARS-CoV-2 epidemiology, and infection prevalence at traveler’s origins to estimate importation risk. Studies found that the Wuhan and China travel ban in early 2020 decreased the number of infections amongst air travelers originating from mainland China and entering other countries (Chinazzi et al, 2020; Wells et al, 2020), and have described the early spread of infection within China (Hossain et al, 2020). Importation modelling has been used to calculate the potential for COVID-19 spread between countries (Nakamura and Managi, 2020), to identify countries expected to have a high percentage of incidence due to importations (Russell et al, 2021), and to determine the effectiveness of post-arrival travel measures (Costantino et al, 2020; Yang et al, 2021).

Given the need for data and models to support decisions to implement travel measures during a pandemic, and because there are few data and guidelines to inform travel measure implementation within countries, we analyze data recorded in Newfoundland and Labrador (NL), a province of Canada that implemented travel measures during the COVID-19 pandemic. We consider multiple sources of travel volume data to minimize the impact of the limitations of each. We validate predictions to inform the best approaches to importation modelling. Other models that have been developed either do not consider travel volumes (Godin et al, 2021; Steyn et al, 2021), do not consider travel-related cases reported at the destination (Hincapie et al, 2022; Linka et al, 2020; Menkir et al, 2021; Russell et al, 2021), or do not distinguish between travel-related and community cases at the destination (Chinazzi et al, 2020; Costantino et al, 2020; Hossain et al, 2020; Wells et al, 2020), with only Yang et al (2021) and McCrone et al (2022) having previously considered all of these data types.

## 2 Methods

### 2.1 Background

Newfoundland and Labrador (NL; population: 510,550; Statistics Canada 2021) is the second smallest Canadian province, and has few points of entry. Most non-resident travelers to NL visit the island of Newfoundland (93%, Government of Newfoundland Labrador 2018, population: 483,895 Statistics Canada 2021) and arrive by air to St. John’s International airport. From May 4, 2020–June 30, 2021, the government of NL implemented travel measures that required non-residents to complete Travel Declaration Forms (TDFs) and self-isolate for 14 days after

arrival. Rotational workers, NL residents working in other provinces, are a significant proportion of the NL workforce (Hewitt et al, 2018), and during the COVID-19 pandemic were subject to specific self-isolation requirements and testing regimes (see SI Appendix 1, Table C7).

## 2.2 Data overview

### 2.2.1 Travel volume to NL

The travel volume that we estimate is all individuals that arrive in NL from other Canadian provinces and the territories, or international origins who might spread infections to the NL community, which we refer to as the ‘total travel volume’. The total travel volume includes arrivals by air, sea, and land ports of entry, crew members, and NL residents, including rotational workers, returning from travel. We consider three data sources that report travel volumes: International Air Transit Authority (IATA) flight passenger data; TDFs completed by non-NL residents and other non-exempt individuals upon arrival to NL during the COVID-19 pandemic; and Frontier Counts (FC) (Statistics Canada, 2020-2021) completed at the Canadian border. All of these data sources provides information on travel volumes from international origins, with the IATA and TDF data also reporting travel from other Canadian provinces and territories to NL. The three sources of travel volume data have some overlap and different limitations (summarised in Table 1), and when combined with tourism surveys from the Government of Newfoundland and Labrador (2020-2021), we were able to estimate correction factors to determine the total travel volume arriving in NL from January 2019 to March 2020, and September 2020 to May 2021 (SI Appendix 1, equation A1). After estimating the total travel volume, we then stratified arriving travelers as regular travelers or rotational workers, and by travel origins (SI Appendix 1, Section A.5, equations A3-A5).

**Table 1** Limitations of travel volume data sources. International Air Transport Authority (IATA,  $s = 1$ ), Travel Declaration Forms (TDF,  $s = 2$ ), and Frontier Counts (FC,  $s = 3$ ) report an origin (either Canada or international), but report travel volumes that exclude some travelers that might spread infections to NL residents. When exclusions apply to a particular data source and origin (Canada or international), the value of the indicator variable is 1 (and 0 otherwise). The magnitude of the correction for the exclusion is given in the Supplementary Information (Table A2, see also equation A1). The travel origin in TCAR reports ( $s = 4$ ) was not reported, but the information in these reports was used to estimate the volume of travelers excluded from the reported travel volumes for the other data sources.

| s | Data Source                                                 | Time frame, $t$                 | Pandemic          | Travel Mode    | $\mathbb{1}_{\text{MODES}} =$ | Origin, $i \in$ | Traveler exclusions                            | $\mathbb{1}_{\text{EXCL}} =$                  |
|---|-------------------------------------------------------------|---------------------------------|-------------------|----------------|-------------------------------|-----------------|------------------------------------------------|-----------------------------------------------|
| 1 | International Air Transport Authority (IATA)                | Jan 2019 - March 2020 (monthly) | before            | air            | 1                             | {CA, INT}       | Crew                                           | 1 if $i = \text{CA}$<br>0 if $i = \text{INT}$ |
| 2 | Travel Declaration Forms (TDF)                              | Sep 2020 - May 2021 (daily)     | during            | air, sea, land | 0                             | {CA, INT}       | NL residents, crew, and other exempt travelers | 1                                             |
| 3 | Frontier Counts (FC)                                        | Jan 2019 - May 2021 (monthly)   | before and during | air, sea, land | 0                             | {INT}           | None                                           | 0                                             |
| 4 | Department of Tourism, Culture, Arts, and Recreation (TCAR) | Jan 2019 - Dec 2021 (monthly)   | before and during | air, sea, land | 0                             | Unknown         | NL residents                                   | 0                                             |

### 2.2.2 The infection status of departing travelers

We estimate infection prevalence at the travelers’ origin from daily incidence in the Canadian provinces and territories as reported by the Public Health Agency of Canada (SI Appendix 1, equation B6). These estimates include adjustments for reporting delays and are multiplied by a coefficient describing under-reporting in each of these regions based on seroprevalence data reported by the COVID Immunity TaskForce. As there are no similar data available for travelers of international origin, we assume that infection prevalence and under-reporting at the traveler’s country of origin is equal to that of the United States of America, where the TDF data reported that 24-50%

106 of international traveler’s arriving in NL during the pandemic were from the United States of America (SI Appendix  
107 1, Table A3).

108 For our epidemiological model (Section 2.3.1), we assume that the exposure date of infected travelers is uniformly  
109 distributed between 0 and 13 days prior to departure. This range was selected because any traveler infected more  
110 than 13 days prior to departure is unlikely to be infectious after arrival (Ferretti et al., 2020). Date of first symptom  
111 onset and Polymerase Chain Reaction (PCR) test sensitivity depends on the number of days since exposure. We  
112 assume that a fraction of infected travelers originating from Canada and internationally, and all travelers that test  
113 positive on pre-departure tests (see SI Appendix 1, Table C7), do not travel (SI Appendix 1, equation B12).

### 114 2.2.3 Post-arrival testing in NL

115 Travelers are reported as travel-related cases only if they test positive for SARS-CoV-2 in NL. Table C7 (see SI  
116 Appendix 1) summarizes different testing requirements applying to rotational workers and regular travelers arriving  
117 in NL.

### 118 2.2.4 Travel-related cases reported in NL

119 It is likely that a high proportion of SARS-CoV-2 infections were detected in arriving travelers due to manda-  
120 tory testing for anyone symptomatic, mandatory testing of rotational workers, intermittent requirements for some  
121 asymptomatic travelers to complete testing (SI Appendix 1, Table C8), and because there were few community  
122 outbreaks of COVID-19 in NL during this time (Hurford et al, 2021). Daily travel-related cases of Canadian and  
123 international origin are referred to as the ‘validation data’ (SI Appendix 1, Figure A1B). These data are main-  
124 tained by Newfoundland and Labrador Health Services, Digital Health (formerly the Newfoundland and Labrador  
125 Center for Health Information), where these same data were also reported in Public Service Announcements from  
126 the Newfoundland and Labrador Department of Health and Community Services during the pandemic.

### 127 2.2.5 Ethics Statement

128 This study involving secondary-use data received ethics approval from the Newfoundland and Labrador Health  
129 Research Ethics Board (reference number 2021.013). Travel-related case data and the TDF data were accessed  
130 September 2021 - August 2023. Consent was not required as the data were anonymized and individuals can not be  
131 re-identified from this analysis.

## 132 2.3 Modelling overview

133 Changes in travel volume, and the percentage of travelers arriving from different origins, was determined by ana-  
134 lyzing the total travel volume as described in Section 2.2.1. Two main approaches to modelling importations are  
135 mechanistic models and statistical models.

### 136 2.3.1 A mechanistic epidemiological model

137 The mechanistic model that we consider incorporates all the epidemiological details and data described in Sections  
138 2.2.1-2.2.3 by considering how the processes occur, and is referred to as the ‘epidemiological model’ (summarized in  
139 Fig. 1). The epidemiological model predicts the number of travelers testing positive for SARS-CoV-2 after arrival in  
140 NL whose travel originated in Canada (SI Appendix 1, equation D22) and internationally (SI Appendix 1, equation  
141 D21; see SI Appendix 1 for the derivation of the epidemiological model). The predictions of the epidemiological  
142 model are validated against the data describing daily travel-related cases of Canadian and international origin  
143 (Section 2.2.4).

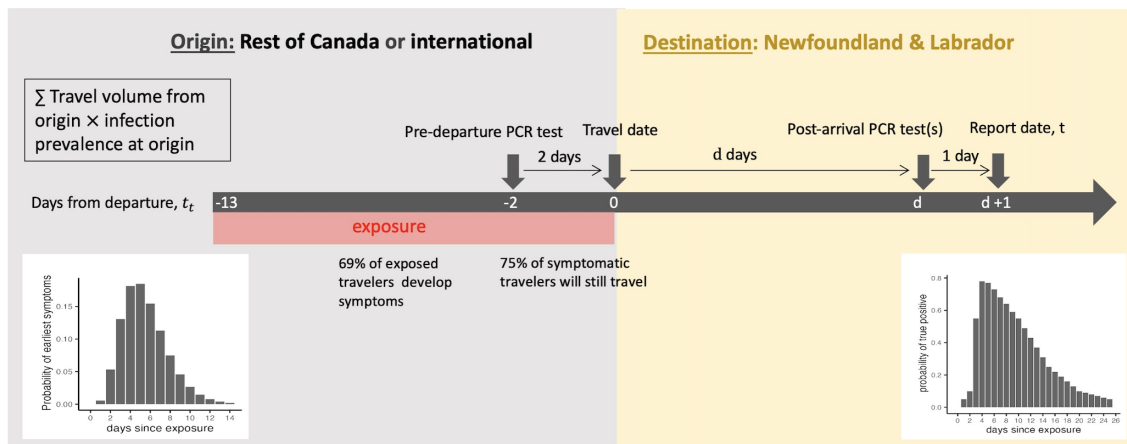

**Fig. 1** Visual overview of the epidemiological model. Travel occurs at  $t_t = 0$ . The number of days between the date of travel and the date of required testing is  $d = \{j_1, j_2, j_3, \bar{a} + t_r, t_r\}$  days after arrival. A pre-arrival test was required for travelers departing from international origins from January 7, 2021. It is assumed that infected travelers were exposed between 0 and 13 days before departure. Probability mass functions describe the timing of first symptoms, and the probability of a true positive Polymerase Chain Reaction (PCR) test as these quantities depend on the number of days since exposure.

### 144 2.3.2 Statistical models

145 The epidemiological model contains many details and precise formulations of relationships, where these details  
 146 may not all be necessary. We formulated nine statistical models that consider relatively few variables and a simple  
 147 model structure. The statistical models are general linear models where the response variable is either the daily  
 148 travel-related cases reported in NL from Canada (Table 2, Models 1-6) or from international origins (Table 2,  
 149 Models 1-3). The models we considered have explanatory variables that are daily total travel volume from an origin  
 150 (Section 2.2.1), daily infection prevalence at origin (Section 2.2.2), or the product of daily infection prevalence and  
 151 travel volume for a given origin. For models to predict daily travel-related cases of Canadian origin, we considered  
 152 stratification of all model variables for each Canadian province and the territories, and aggregation of variables for  
 153 all of Canada (Table 2, Canada: Models 4-6). We used corrected Akaike Information Criteria (AICc) to determine  
 154 which of the epidemiological model or any of the statistical models best predicted the validation data without  
 155 over-fitting.

## 156 3 Results

157 We found that the total travel volume arriving in NL declined by 82% during the pandemic while travel measures  
 158 were enacted (September 2020 to May 2021) compared to the same period a year prior (Fig. 2A; red line). During  
 159 the pandemic, the percentage of travelers arriving in NL from different origins also changed (Fig. 3). Relative to  
 160 the same 9 months one year prior to the pandemic, the average percentage of travelers arriving in NL increased  
 161 from British Columbia (2.5 to 5.5%), Alberta (7 to 17%), the Canadian territories (0.3 to 3.3%), and international  
 162 origins not the United States (8 to 15%; Fig. 3). The average percentage of travelers arriving in NL during the  
 163 pandemic decreased from Ontario (27 to 21%), Québec (14 to 4%), and the United States (14 to 8%; Fig. 3).

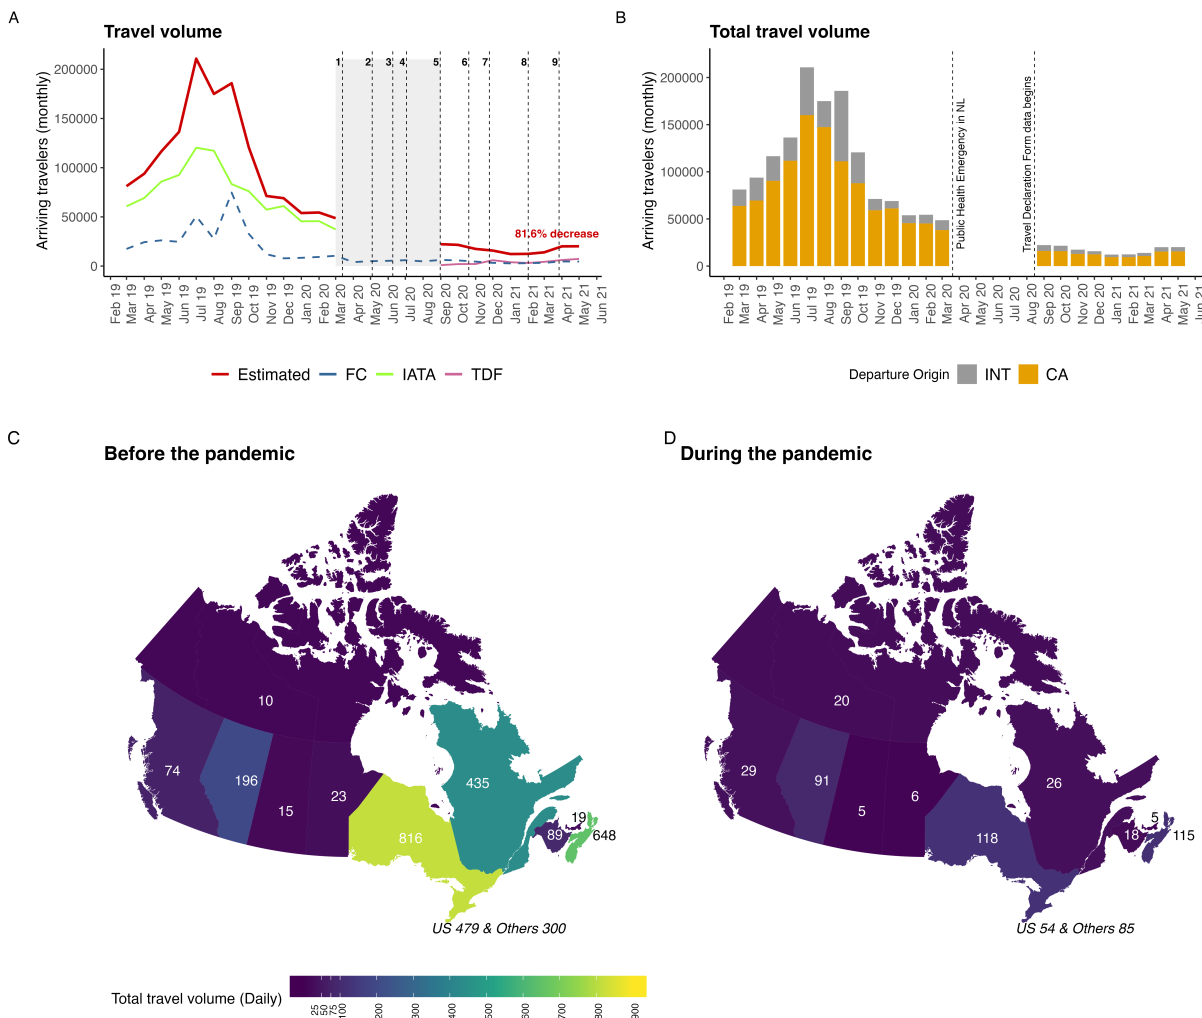

**Fig. 2** A) The total travel volume arriving in Newfoundland and Labrador before and during the pandemic (red line,  $V_{CA} + V_{INT}$ , SI Appendix 1, equation A1), and travel volumes reported by individual data sources: International Air Transport Authority (IATA, green line); Travel Declaration Forms (TDF; purple line); and Frontier Counts (FC; blue line). The numbered vertical lines correspond to travel measures implemented in NL (see SI Appendix 1, Table A1). B) Total travel volume arriving from Canadian and international origins (SI Appendix 1, equation A1). C) and D) The average number of travelers arriving daily before and during the pandemic and their region of origin, where these averages are taken over 9 months.

164 We found that travel-related cases arriving in NL from Canada were best predicted by a statistical model with  
 165 explanatory variables that were daily travel volume multiplied by daily infection prevalence where both variables  
 166 are stratified for each of the provinces of Canada and the Canadian territories (Table 2,  $R^2 = 0.551$  and Fig. 4).  
 167 Our epidemiological model was the lowest ranked model (Table 2,  $\Delta AICc = 137$ ,  $R^2 = 0.155$ ) for travel-related  
 168 cases originating in Canada. The poor performance of the epidemiological model for predicting travel-related  
 169 cases originating in Canada is due to substantial under-estimation of the number of reported travel-related cases in April  
 170 and May 2021 (Fig. 4C).

171 All of the models we considered were inadequate to predict travel-related cases arriving in NL from international  
 172 origins (Table 2,  $R^2 < 0.06$ ). This is likely because few travel-related cases of international origin were reported (less  
 173 than 20 per month, Fig. 4D, grey line), and because we assumed that the infection prevalence in all non-Canadian  
 174 countries was equal to that of the United States of America owing to inconsistent reporting of infections between  
 175 countries.



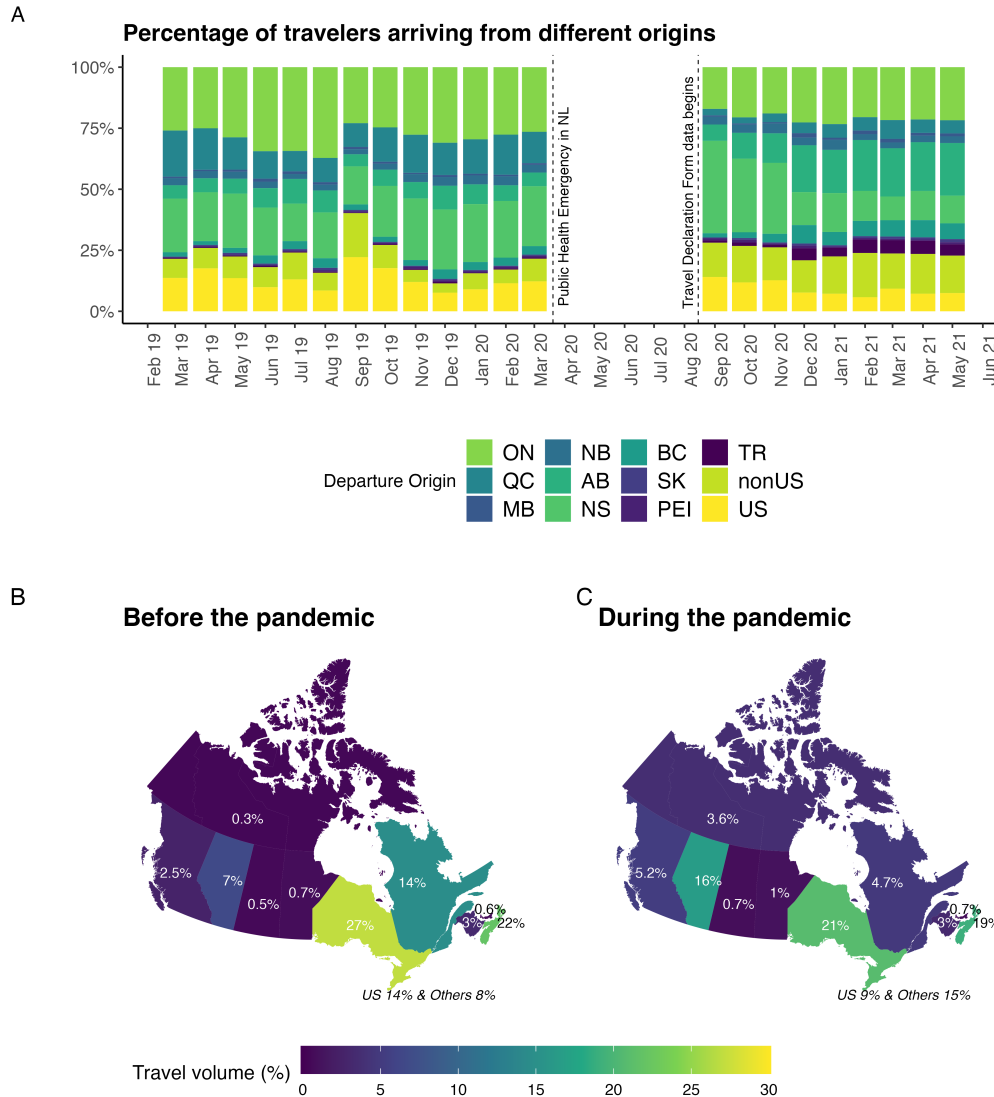

**Fig. 3** Effect of the pandemic on the percentage of travelers arriving in NL from different origins. A) The percentage of travel volume each month from each of the 9 non-NL Canadian provinces, the Canadian territories (TR is all three territories combined), the United States, and non-United States international origins. B) The average percentage of arrivals from particular origins for 9 months during the pandemic (September 2019 to March 2020, and April to May 2019) and C) this same average for the same 9 months during the pandemic (September 2020 to May 2021).

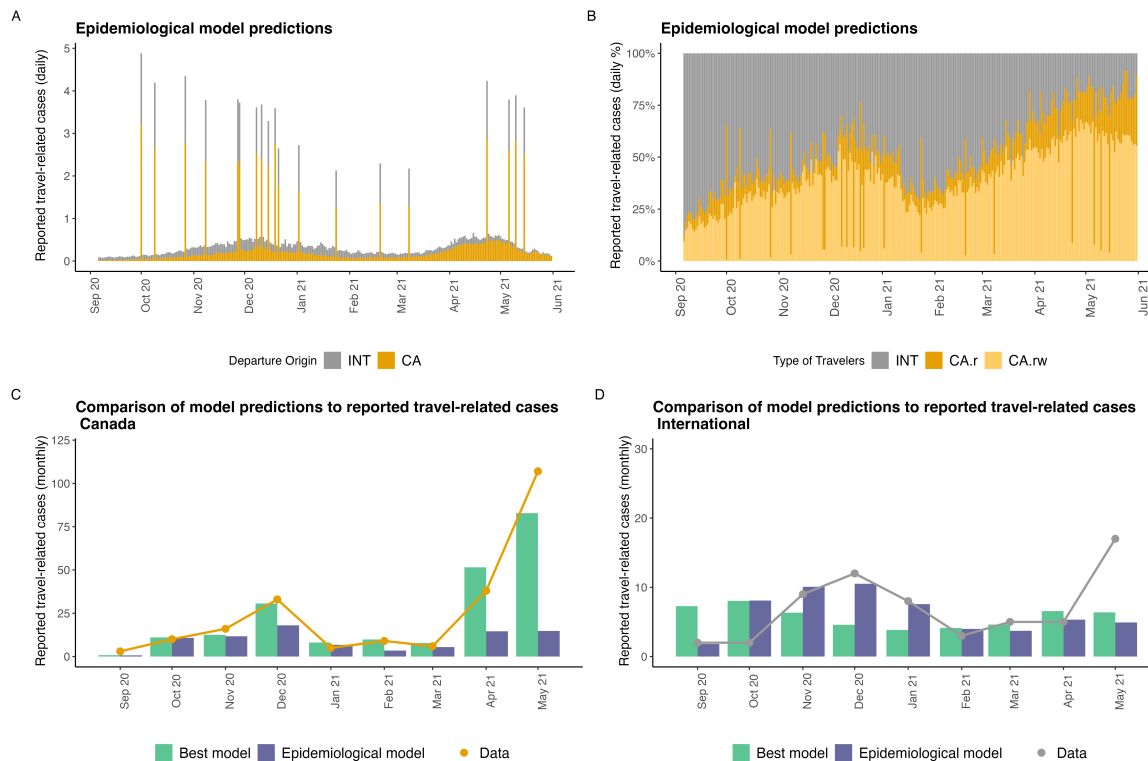

**Fig. 4** A) Prediction by the epidemiological model of daily reported travel-related cases for travelers arriving from Canadian (CA) and international (INT) origins. The ‘spikes’ coincide with the exposure notifications (see Supplementary Information, Table C8) that required travelers on particular flights to be tested. B) Prediction by the epidemiological model of the daily percentage of travel-related cases that is of Canadian origin, both regular travelers (CA.r, dark yellow) and rotational workers (CA.rw, light yellow), and from international origins (grey). Predicted reported travel-related cases arriving in NL (monthly) for the epidemiological model (blue bars) and the best model (green bars; see Table 2) for travelers originating from (C) Canadian and (D) international origins. In both, C and D monthly travel-related cases reported in NL are shown with lines. The results are shown in panels C) and D) but as predicted daily travel-related cases are shown in SI Appendix 1, Fig. E2.

**Table 2** Model selection for predicted daily travel-related cases reported in NL from Canadian and international origins. Models where variables are stratified for Canadian provinces and the territories are denoted with ‘Provinces’ in parenthesis. Models where variables are aggregated for the Canadian provinces and the territories are denoted with ‘Canada’ in parenthesis.

|                      | Canada                                           | <i>K</i> | AICc   | $\Delta$ AICc | LL     | <i>R</i> <sup>2</sup> |
|----------------------|--------------------------------------------------|----------|--------|---------------|--------|-----------------------|
| 1                    | Travel volume × Infection prevalence (Provinces) | 11       | 889.1  | 0.00          | -433.0 | 0.551                 |
| 2                    | Infection prevalence (Provinces)                 | 11       | 921.2  | 32.09         | -449.1 | 0.495                 |
| 3                    | Travel volume (Provinces)                        | 11       | 946.4  | 57.3          | -461.7 | 0.446                 |
| 4                    | Travel volume × Infection prevalence (Canada)    | 2        | 990.4  | 101.4         | -493.2 | 0.302                 |
| 5                    | Travel volume (Canada)                           | 2        | 1005.4 | 116.4         | -500.7 | 0.262                 |
| 6                    | Infection prevalence (Canada)                    | 2        | 1008.0 | 118.9         | -502.0 | 0.256                 |
| 7                    | Epidemiological model (Provinces)                | 1        | 1026.0 | 136.9         | -512.0 | 0.156                 |
| <b>International</b> |                                                  |          |        |               |        |                       |
| 1                    | Travel volume                                    | 2        | 676.6  | 0.00          | -336.3 | 0.056                 |
| 2                    | Infection prevalence                             | 2        | 677.9  | 1.28          | -336.9 | 0.052                 |
| 3                    | Travel volume × Infection prevalence             | 2        | 679.1  | 2.52          | -337.6 | 0.048                 |
| 4                    | Epidemiological model                            | 1        | 683.5  | 6.8           | -340.7 | 0.003                 |



## 176 4 Discussion

177 In July 2021, the World Health Organization (WHO) updated guidelines for international travel ([World Health  
178 Organization, 2021](#)) to advise that local epidemiology, and public health and health system performance and  
179 capacity, should be considered to determine if travel measures are appropriate during a pandemic. Data, analysis,  
180 and models are needed to support these updated guidelines. We analyzed data from the Canadian province of  
181 Newfoundland and Labrador (NL) to estimate the impact of travel measures. We investigated the accuracy of  
182 models with different levels of detail to predict daily travel-related cases reported in NL. Our results are evidence  
183 that will inform future risk assessment frameworks to support decisions of whether travel measures should be  
184 implemented during public health emergencies. Analysis of regional data, and regionally-specific models, are needed  
185 because decisions of whether travel measures are appropriate depend on regional characteristics.

186 We estimated that travel measures (described in SI Appendix 1, Section [A.2](#)), reduced the total travel volume  
187 arriving in NL by 82% (September 2020 - May 2021) compared to the same 9 months prior to the pandemic (Figure  
188 [2A](#), red line). This finding is similar to an estimated 79% reduction in non-resident visitor volume to NL for 2020  
189 compared to 2019 ([Government of Newfoundland and Labrador, 2020](#)). In other countries, air travel is estimated  
190 to have declined, on average, 63% for May 2020 (during the pandemic) as compared to May 2019 (before the  
191 pandemic; [Russell et al 2021](#)). The more substantial reduction in travel to NL may have been due to stricter travel  
192 measures for entry to NL than for other countries and regions during the study period. Most notably, non-NL  
193 residents entering NL from other regions of Canada were required to complete Travel Declaration Forms (TDFs)  
194 and have a self-isolation plan to submit to a government representative at entry. These results help quantify the  
195 impact of travel measures implemented during a pandemic because modelling that predicts clinical cases depend  
196 on assumptions describing how travel measures affect travel volume ([Hurford et al, 2021](#)).

197 We found that during the pandemic there was a 10% increase in arrivals from Alberta, and a 10% decrease in  
198 arrivals from Québec (Fig. [3](#)) to NL. Evidence for this result can be seen in Table [A4](#) (see SI Appendix 1), where  
199 the percentages before the pandemic (January 2019 - March 2020) are calculated from the International Air Transit  
200 Authority (IATA) data, and the percentages during the pandemic (September 2020 - May 2021) are calculated  
201 from the TDF data. This shift in the percentage of travelers arriving from different provinces may be explained by  
202 the high percentage of NL's rotational workers that work in Alberta (57%) as compared to Québec (2%; Table [A4](#)  
203 in SI Appendix 1), while the travel volume of regular travelers from Québec before the pandemic is relatively high  
204 (11-26%, third highest behind Ontario and Nova Scotia, Table [A4](#) in SI Appendix 1). Rotational workers likely  
205 continued working during the pandemic, while regular travelers may have delayed or canceled trips. Importation  
206 models used during public health emergencies often consider the product of infection prevalence at the travelers'  
207 origin multiplied by the travel volume from that origin (i.e., [World Health Organization 2020c](#) and equation 1  
208 in [Nakamura and Managi 2020](#)). An implication of our findings is that the travel volume data used for these  
209 calculations needs to correspond to the period of the public health emergency, or should consider the purpose of  
210 the trip, i.e., work or vacation, as travel volumes from different origins can be reduced by different amounts due to  
211 travel measures.

212 Our results provide insights into how to formulate importation models. While one approach to importation modelling  
213 has been to include many epidemiological details, the predictions of these models ([Hincapie et al, 2022](#); [Linka et al,  
214 2020](#); [Nakamura and Managi, 2020](#); [Russell et al, 2021](#)) have not been tested against data describing the number  
215 of travel-related cases reported in a region. When validated, our epidemiological model explained only 15.6% of  
216 the variance in daily travel-related cases arriving in NL from Canada, which is quite low. We found that a very  
217 substantial amount of predictive value is added (up to  $R^2 = 0.551$ ) when the data reporting travel-related cases is  
218 considered in the modelling (Table [2](#)).

219 If travel measures are to be considered during a public health emergency, then a main finding of our analysis is that  
220 travelers should be tested for SARS-CoV-2, and daily travel-related cases need to be reported to support importation  
221 modelling. Early in the COVID-19 pandemic, WHO situation reports described transmission classifications as  
222 imported cases only, sporadic cases, clusters of cases, local transmission, and community transmission where this  
223 information was self-reported by the State Parties ([World Health Organization, 2020a,b](#)). Testing of travelers at  
224 points of entry is a core surveillance method to support early warning for change in epidemiological patterns  
225 ([World Health Organization, 2022](#)), and information on whether individuals testing positive for SARS-CoV-2 have

226 a history of travel is frequently collected (i.e., [Dunajcik et al. 2023](#)). However, it is well-established that travel-  
227 related cases make negligible contributions to epidemic spread when community outbreaks are ongoing (see, e.g.  
228 [Arino et al 2021](#)), and investigating the travel history of reported cases in such situations may be time-consuming  
229 and infeasible. Therefore, it is not necessary for all regions to report the number of cases with a travel history all  
230 the time ([Martignoni et al, 2023](#)).

231 A further finding of our analysis is that it is necessary to consider travel volume and infection prevalence data that is  
232 stratified by province as when these data are considered, an additional 25% of variance in daily travel-related cases  
233 arriving in NL from Canadian origins is explained (Table 2, Model 1 vs. Model 4). None of our models predicted  
234 the daily number of travel-related cases from international origins adequately ( $R^2 < 0.06$  for all models in Table  
235 2), but under-reporting varies substantially between countries and serology data to estimate under-reporting was  
236 unavailable for most countries. Our best model predicting daily travel-related cases from Canada performed very  
237 well, with infection prevalence in non-NL provinces and the territories being an important variable (i.e., Model 2  
238 in Table 2,  $R^2 = 0.495$ ). This suggests that if infection prevalence data were more standardized, then it is likely  
239 that the performance of importation models would improve substantially.

240 There are number of reasons why the predictions of importation models may not hold and should be validated. Data  
241 quality may not be sufficient to make accurate predictions. Many studies consider only air travel volumes ([Chinazzi  
242 et al, 2020](#); [Hincapie et al, 2022](#); [Nakamura and Managi, 2020](#); [Russell et al, 2021](#); [Wells et al, 2020](#)), although  
243 travelers are likely to arrive via other travel modes and this proportion may change seasonally. No one travel volume  
244 data source reports the epidemiologically-relevant travel volume. Travel documents completed at international  
245 borders omit travelers that originate from within the country, and not all travel between countries requires such  
246 documents to be completed (i.e., travel between countries in the European Union). Provinces may conduct surveys  
247 to understand tourist preferences, but such surveys (i.e., [Government of Newfoundland and Labrador 2020-2021](#))  
248 usually focus only on non-resident travel, while returning residents and workers are a potential source of imported  
249 infection. We combined four data sources (see SI Appendix 1, Section A) to overcome limitations of each and to  
250 estimate total travel volume; however, this was very time-consuming, and to model importations urgently during  
251 a public health emergency, it is necessary that total travel volume data is available in real time.

252 It may be difficult to accurately and consistently estimate infection prevalence reported for different regions due to  
253 differences in accessibility of testing, available resources for testing, willingness of different populations to get tested,  
254 and lack of seroprevalence data. Both travel volume and infection prevalence data may be only available for large  
255 spatial scales, which may be insufficient as it has been shown that infection prevalence can vary on the neighborhood  
256 scale ([Xia et al, 2022](#)), and aggregation at large spatial scales may impact the predictions of importation models.  
257 Modelling assumes that travelers are drawn randomly from the population at the origin, whereas in practice travelers  
258 may be of a higher income, which is associated with lower infection prevalence ([Wang et al, 2022](#)).

259 Overall, our results highlight the importance of testing travelers and reporting travel-related cases alongside travel-  
260 er characteristics, such as travel origin and reason for travel. Estimating model parameters from data describing  
261 travel-related cases improves model predictions much more substantially than formulating models with more epi-  
262 demiological realism. Importation models require real time travel volume data and quality data describing infection  
263 prevalence at travelers' origins, and both need to be reported at small spatial scales. Such improvements in  
264 data quality and availability are needed for importation models to support decision-making during public health  
265 emergencies.

266 **Acknowledgments.** We thank one anonymous reviewer for comments that greatly improved the manuscript. All  
267 authors were supported by funding from Mathematics for Public Health (560523-2020), the One Health Modelling  
268 Network for Emerging Infections (560520-2020), and by the Emerging Infectious Disease Modelling Consortium  
269 funded by the Natural Sciences and Engineering Council of Canada. AH and JA are supported by the Canadian  
270 Network for Modelling Infectious Diseases (560516-2020). We thank Newfoundland and Labrador Health Services,  
271 Digital Health, and K. Lester for support in accessing the data.

## Declarations

- **Funding.** All authors were supported by funding from Mathematics for Public Health (560523-2020), the One Health Modelling Network for Emerging Infections (560520-2020), and by the Emerging Infectious Disease Modelling Consortium funded by the Natural Sciences and Engineering Council of Canada. AH and JA are supported by the Canadian Network for Modelling Infectious Diseases (560516-2020).
- **Competing interests.** AH was a member of the Newfoundland and Labrador Predictive Analytics modelling team and previously received funding from the Department of Health and Community Services, Newfoundland and Labrador.
- **Availability of data and materials.** Newfoundland and Labrador Health Services - Digital Health, formerly the Newfoundland and Labrador Centre for Health Information (NLCHI), is the data custodian for the Travel Declaration Form data and Newfoundland and Labrador COVID-19 cases.
- **Code availability.** The code used for analysis is [publicly available](#).

## References

- Anderson RM, Heesterbeek H, Klinkenberg D, et al (2020) How will country-based mitigation measures influence the course of the COVID-19 epidemic? *The Lancet* 395(10228):931–934
- Arino J, Boëlle PY, Milliken E, et al (2021) Risk of COVID-19 variant importation—How useful are travel control measures? *Infectious Disease Modelling* 6:875–897
- Burns J, Movsisyan A, Stratil JM, et al (2021) International travel-related control measures to contain the COVID-19 pandemic: a rapid review. *Cochrane Database of Systematic Reviews* (3)
- Chinazzi M, Davis JT, Ajelli M, et al (2020) The effect of travel restrictions on the spread of the 2019 novel coronavirus (COVID-19) outbreak. *Science* 368(6489):395–400
- Costantino V, Heslop DJ, MacIntyre CR (2020) The effectiveness of full and partial travel bans against COVID-19 spread in Australia for travellers from China during and after the epidemic peak in China. *Journal of Travel Medicine* 27(5). <https://doi.org/10.1093/jtm/taaa081>
- Dunajcik et al. (2023) Travel history among persons infected with SARS-CoV-2 variants of concern in the United States, December 2020—February 2021. *PLOS Global Public Health* URL <https://doi.org/10.1186/s12889-020-09282-44>
- Ferretti et al. (2020) Quantifying SARS-CoV-2 transmission suggests epidemic control with digital contact tracing. *Science* 368:eabb6936. URL [DOI:10.1126/science.abb6936](https://doi.org/10.1126/science.abb6936)
- Godin A, Xia Y, Buckeridge DL, et al (2021) The role of case importation in explaining differences in early SARS-CoV-2 transmission dynamics in Canada—A mathematical modeling study of surveillance data. *International Journal of Infectious Diseases* 102:254–259
- Government of Newfoundland and Labrador (2020) Department of Tourism, Culture, Arts and Recreation, 2020 Tourism Highlights, URL [https://www.gov.nl.ca/tcar/files/2020\\_Tourism\\_Performance\\_June2021.pdf](https://www.gov.nl.ca/tcar/files/2020_Tourism_Performance_June2021.pdf)
- Government of Newfoundland and Labrador (2020-2021) Department of Tourism, Culture, Arts and Recreation, URL <https://www.gov.nl.ca/tcar/tourism-division/visitor-and-market-insights/>
- Government of Newfoundland Labrador (2018) Tourism, Culture, Arts and Recreation. 2016 EXIT SURVEY – Result Highlights, URL [https://www.gov.nl.ca/tcar/files/2016\\_Exit\\_Survey\\_Highlights\\_Report\\_FINAL\\_REVISED\\_June.2018.pdf](https://www.gov.nl.ca/tcar/files/2016_Exit_Survey_Highlights_Report_FINAL_REVISED_June.2018.pdf), [Updated June 2018]

- 311 Grépin KA, Ho TL, Liu Z, et al (2021) Evidence of the effectiveness of travel-related measures during the early  
312 phase of the COVID-19 pandemic: a rapid systematic review. *BMJ Global Health* 6(3):e004537
- 313 Grépin KA, Aston J, Burns J (2023) Effectiveness of international border control measures during the COVID-  
314 19 pandemic: a narrative synthesis of published systematic reviews. *Philos Trans A Math Phys Eng Sci*  
315 81(2257):20230134. URL [doi:10.1098/rsta.2023.0134](https://doi.org/10.1098/rsta.2023.0134)
- 316 Hewitt CM, Haan M, Neis B (2018) Interprovincial employees from Newfoundland and Labrador, 2005-2014.  
317 Memorial University of Newfoundland
- 318 Hincapie R, Munoz DA, Ortega N, et al (2022) Effect of flight connectivity on the introduction and evolution of  
319 the COVID-19 outbreak in Canadian provinces and territories. *Journal of Travel Medicine* 29(8):taac100
- 320 Hossain MP, Junus A, Zhu X, et al (2020) The effects of border control and quarantine measures on the spread of  
321 COVID-19. *Epidemics* 32:100397
- 322 Hurford A, Rahman P, Loredó-Osti JC (2021) Modelling the impact of travel restrictions on COVID-19 cases in  
323 Newfoundland and Labrador. *Royal Society Open Science* 8(6):202266
- 324 Linka K, Rahman P, Goriely A, et al (2020) Is it safe to lift COVID-19 travel bans? The Newfoundland story.  
325 *Computational mechanics* 66:1081–1092
- 326 Martignoni M, Arino J, Hurford A (2023) Is SARS-CoV-2 elimination or mitigation best? Regional and disease  
327 characteristics determine the recommended strategy. *MedRxiv* URL [https://www.medrxiv.org/content/10.1101/  
328 2024.02.01.24302169v1](https://www.medrxiv.org/content/10.1101/2024.02.01.24302169v1)
- 329 McCrone J, Hill V, Bajaj S, et al (2022) Context-specific emergence and growth of the SARS-CoV-2 Delta variant.  
330 *Nature* 610:154–160
- 331 Menkir TF, Chin T, Hay JA, et al (2021) Estimating internationally imported cases during the early COVID-19  
332 pandemic. *Nature Communications* 12(1):311
- 333 Nakamura H, Managi S (2020) Airport risk of importation and exportation of the COVID-19 pandemic. *Transport*  
334 *Policy* 96:40–47. <https://doi.org/https://doi.org/10.1016/j.tranpol.2020.06.018>
- 335 Piccoli L, Dzankic J, Ruedin D, et al (2022) Restricting Human Movement During the COVID-19 Pandemic:  
336 New Research Avenues in the Study of Mobility, Migration, and Citizenship. *International Migration Review* p  
337 01979183221118907
- 338 Reddy KS, Mithani SS, Wilson L, et al (2021) Canada’s response to international travel during COVID-19  
339 pandemic—a media analysis. *BMC Public Health* 21(1):1–8
- 340 Russell TW, Wu JT, Clifford S, et al (2021) Effect of internationally imported cases on internal spread of COVID-19:  
341 a mathematical modelling study. *The Lancet Public Health* 6(1):e12–e20
- 342 Shoichet CE (2020) 93% of people around the world live in countries with coronavirus travel bans, URL [https://  
343 www.cnn.com/travel/article/countries-with-travel-restrictions-coronavirus/index.html](https://www.cnn.com/travel/article/countries-with-travel-restrictions-coronavirus/index.html), [Accessed: April 1, 2020]
- 344 Statistics Canada (2020-2021) Frontier counts, URL [https://www23.statcan.gc.ca/imdb/p2SV.pl?Function=  
345 getSurvey&SDDS=5005](https://www23.statcan.gc.ca/imdb/p2SV.pl?Function=getSurvey&SDDS=5005), [Updated on: March 13, 2023]
- 346 Statistics Canada (2021) Census Profile, 2021 Census of Population, URL [https://www12.statcan.gc.ca/  
347 census-recensement/2021/dp-pd/prof/index.cfm?Lang=E](https://www12.statcan.gc.ca/census-recensement/2021/dp-pd/prof/index.cfm?Lang=E), [Updated on: March 29, 2023]
- 348 Steyn N, Plank MJ, James A, et al (2021) Managing the risk of a COVID-19 outbreak from border arrivals. *Journal*  
349 *of the Royal Society Interface* 18(177):20210063

- 350 Studdert DM, Hall MA, Mello MM (2020) Partitioning the curve—interstate travel restrictions during the Covid-19  
351 pandemic. *New England Journal of Medicine* 383(13):e83
- 352 Wang L, Calzavara A, Baral S, et al (2022) Differential Patterns by Area-Level Social Determinants of Health in  
353 Coronavirus Disease 2019 (COVID-19)–Related Mortality and Non–COVID-19 Mortality: A Population-Based  
354 Study of 11.8 Million People in Ontario, Canada. *Clinical Infectious Diseases* 76(6):1110–1120. <https://doi.org/10.1093/cid/ciac850>
- 356 Wells CR, Sah P, Moghadas SM, et al (2020) Impact of international travel and border control measures on  
357 the global spread of the novel 2019 coronavirus outbreak. *Proceedings of the National Academy of Sciences*  
358 117(13):7504–7509
- 359 World Health Organization (2020a) Coronavirus disease (COVID-19) Situation Report – 157, URL <https://www.who.int/docs/default-source/coronaviruse/situation-reports/20200625-covid-19-sitrep-157.pdf>
- 361 World Health Organization (2020b) Coronavirus disease (COVID-19) Situation Report – 39, URL <https://www.who.int/docs/default-source/coronaviruse/situation-reports/20200228-sitrep-39-covid-19.pdf>
- 363 World Health Organization (2020c) Risk assessment tool to inform mitigation measures for international travel  
364 in the context of COVID-19: annex to: Considerations for implementing a risk-based approach to international  
365 travel in the context of COVID-19, 16 December 2020, URL <https://iris.who.int/handle/10665/337850>
- 366 World Health Organization (2020d) Statement on the second meeting of the International Health Regulations  
367 (2005) Emergency Committee regarding the outbreak of novel coronavirus (2019-nCoV), URL [https://www.who.int/news/item/30-01-2020-statement-on-the-second-meeting-of-the-international-health-regulations-\(2005\)-emergency-committee-regarding-the-outbreak-of-novel-coronavirus-\(2019-ncov\)](https://www.who.int/news/item/30-01-2020-statement-on-the-second-meeting-of-the-international-health-regulations-(2005)-emergency-committee-regarding-the-outbreak-of-novel-coronavirus-(2019-ncov)), [January 30, 2020]
- 370 World Health Organization (2021) Policy considerations for implementing a risk-based approach to international  
371 travel in the context of COVID-19, 2 July 2021. In: Policy considerations for implementing a risk-based approach  
372 to international travel in the context of COVID-19, 2 July 2021. URL <https://www.who.int/publications/i/item/WHO-2019-nCoV-Policy-Brief-Risk-based-international-travel-2021.1>
- 374 World Health Organization (2022) Public Health Surveillance for COVID-19. Interim Guidance. July 22., URL  
375 <https://iris.who.int/bitstream/handle/10665/360580/WHO-2019-nCoV-SurveillanceGuidance-2022.2-eng.pdf>
- 376 Xia Y, Ma H, Moloney G, et al (2022) Geographic concentration of SARS-CoV-2 cases by social determinants of  
377 health in metropolitan areas in Canada: a cross-sectional study. *CMAJ* 194(6):E195–E204. <https://doi.org/10.1503/cmaj.211249>
- 379 Yang B, Tsang TK, Wong JY, et al (2021) The differential importation risks of COVID-19 from inbound travellers  
380 and the feasibility of targeted travel controls: A case study in Hong Kong. *Lancet Regional Health - Western*  
381 *Pacific* 13:100184



## 382 Appendix A Travel volume

### 383 A.1 Pre-pandemic

384 International Air Transport Association (IATA) data reported the number of passengers traveling in all classes  
385 for flights to and from Newfoundland and Labrador from January 2019 through March 2020 ([International Air  
386 Transport Association, 2020](#)). We focus on the origin and destination that were reported for each trip (not layovers).  
387 We classify the data into three categories: inbound, outbound, and within province. In this work, we use inbound  
388 air travel volume.

### 389 A.2 During the pandemic

390 In response to the COVID-19 pandemic in Newfoundland and Labrador, several travel measures were implemented  
391 at the federal or provincial levels. At the federal level, on March 16, 2020, entry into Canada by air was allowed only  
392 to Canadians and permanent residents of Canada, and citizens of the United States of America. Air crews, travelers  
393 arriving in Canada in transit to a third country, diplomats, or immediate family members of Canadian citizens were  
394 also exempt ([Trudeau, 2020](#)). At the provincial level, on March 20, 2020, 14-day self-isolation was ordered for all  
395 individuals entering Newfoundland and Labrador from outside the province ([Exemption Order, 2020](#)). This order  
396 included some exemptions, e.g. workers in transportation, essential workers, and rotational workers ([Exemption  
397 Order 2, 2020](#)). Further provincial travel measures were implemented on April 23, 2020 ([Amendment No. 6, 2020](#)).  
398 These measures required that all individuals arriving in Newfoundland and Labrador from outside the province must  
399 complete a Travel Declaration Form (TDF) and have a self-isolation plan to submit to a government representative  
400 upon entry. Also, all individuals arriving in the Labrador part of the province by motor vehicle from the province  
401 of Québec must immediately stop at their point of entry indicated by a representative of the Government of  
402 Newfoundland and Labrador, to submit their declaration form and their self-isolation plan ([Amendment No. 8,  
403 2020](#)).

404 Effective May 4, 2020, all individuals were prohibited from entering Newfoundland and Labrador except residents of  
405 Newfoundland and Labrador, asymptomatic workers, and individuals who received a travel exemption ([Amendment  
406 No.11, 2020; Travel Exemption Order, 2020](#)). There were limited numbers of exempted individuals who were not  
407 required to complete the TDF and submit the self-isolation plan. These were travelers who stayed in the province  
408 less than 24 hours, arrived daily or several times a day via the Labrador-Québec border, entered the province via the  
409 Labrador-Québec border for school reasons, or arrived weekly or several times a week in the province ([Declaration  
410 Exemption Order, 2020; Self-Isolation Exemption Order, 2020](#)). Submitting a TDF at the Labrador-Québec border  
411 relaxed further on June 25, 2020, especially for the residents of Labrador City, Wabush, Fermont, the Labrador  
412 Straits area, Blanc Sablon, and greater Québec Lower North Shore area ([Labrador-Quebec Border Amendments,  
413 2020](#)). Completing a TDF was required even when the Atlantic Bubble was enacted ([Atlantic Travel Amendments,  
414 2020](#)). All these travel orders were in place until the first phase of reopening. Effective on July 1, 2021, an approved  
415 reason to travel to the province, and completion of a TDF, was no longer required ([Re-Opening - Travel, 2021](#)). We  
416 use the TDF information maintained by Newfoundland and Labrador Health Services, Digital Health, to estimate  
417 arrival volume in the province during the pandemic.

**Table A1** Federal and provincial travel measures in Newfoundland and Labrador from September 2020 to May 2021 (Canadian Institute for Health Information, 2022). ‘Line’ corresponds to the numbering in Fig. 2A of the main text.

| Line | Dates      | Measure                                                                                                                       | Level |
|------|------------|-------------------------------------------------------------------------------------------------------------------------------|-------|
| 1    | 2020-03-13 | Cruise ship season postponed                                                                                                  | Fed   |
|      | 2020-03-14 | 14-day self-isolation required for individuals returning from international travel                                            | Prov  |
|      | 2020-03-20 | 14-day self-isolation required for individuals returning from out-of-province travel                                          | Prov  |
| 2    | 2020-05-04 | Travel declaration forms and self-isolation plan for non-NL resident entry to NL                                              | Prov  |
| 3    | 2020-06-09 | Travel measures for foreign nationals with immediate family in Canada relaxed                                                 | Fed   |
| 4    | 2020-07-03 | Travel bubble with P.E.I., N.B. and N.S. announced allowing entrance from these provinces without requirement to self-isolate | Prov  |
| 5    | 2020-08-31 | Travel measures eased for non-Atlantic Canada residents who own a second home or cabin in Newfoundland and Labrador           | Prov  |
| 6    | 2020-10-20 | Travel measures for international students attending institutions with a COVID-19 readiness plan eased                        | Fed   |
| 7    | 2020-11-25 | Travel into the province from the Atlantic bubble restricted to essential travel only                                         | Prov  |
| 8    | 2021-02-01 | Announced that all international passenger flights must land either at the Vancouver, Calgary, Toronto or Montréal airports   | Fed   |
| 9    | 2021-03-27 | Limited passengers on provincial ferries to essential travelers only                                                          | Prov  |

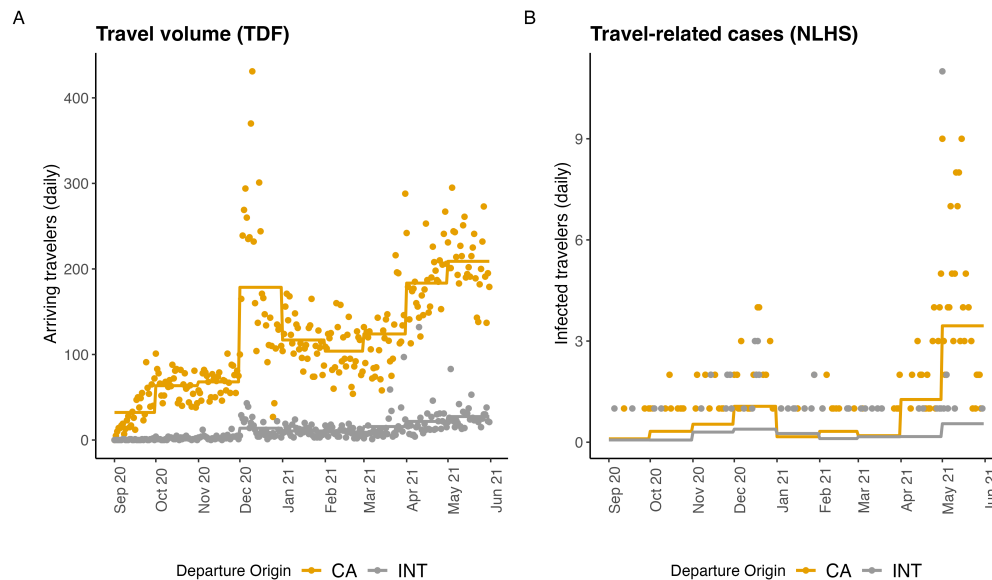

**Fig. A1** A. Travel volume of non-exempt travelers arriving in NL as reported by the TDF. Travel volume is a variable included in several of our models and may affect the number of travel-related cases reported in NL B. Travel-related cases reported in the Newfoundland and Labrador Health Services (NLHS) COVID-19 database (September 2020 to May 2021; Canada - yellow; international - grey). Both daily values (dots) and monthly averages (lines) are shown.

### 418 A.3 All time

419 The Frontier Counts (FC) provide counts of entries into Canada by international travelers at Canadian ports of  
 420 entry. Total travel volume includes all international travelers that were categorized as: Canadian residents returning  
 421 to Canada, United States of America residents entering Canada, residents of countries other than the United States  
 422 of America entering Canada and ‘other’ travelers which consist of foreign and resident crew members, diplomats,  
 423 military personnel, immigrants and former residents (Statistics Canada, 2020-2021). For this study, we focus on  
 424 Newfoundland and Labrador ports of entry.

425 Data reported by Frontier Counts are extracted from different data sources provided by the Canada Border Services  
 426 Agency (CBSA), i.e., Primary Inspection Kiosks (electronic systems at major airports), E311 Declaration Cards



427 (forms completed at Canadian international airports without electronic system), and Telephone Reporting Centre-  
 428 CANPASS (an electronic system for private plane or private boat or who report a land crossing by phone) ([Statistics  
 429 Canada, 2020-2021](#)).

## 430 A.4 Estimating travel volumes not reported in the data sources

### 431 A.4.1 Non-air travel volume from Canadian origins

432 Reports from the Newfoundland and Labrador Department of Tourism, Culture, Arts and Recreation (TCAR)  
 433 from 2011 to 2018 indicate that air travel is the main mode of arrival for visitors to NL regardless of the season.  
 434 The mean percentage of non-NL resident visitors arriving by air, auto, and cruise ships was 76%, 18%, and 6%  
 435 respectively over three years 2016 to 2018 ([Government of Newfoundland Labrador, 2017, 2018a](#)).

436 From May to October 2016, 73% of non-NL residents arriving from Canadian origins to Newfoundland and Labrador  
 437 were by air ([Government of Newfoundland Labrador, 2016](#)); for arrivals from international origins this value was  
 438 85% ([Government of Newfoundland Labrador, 2018](#)), and with the remaining non-NL resident arrivals occurring by  
 439 auto/ferry. Regardless of origin, the fraction of non-NL resident visitors who are using auto/ferry in spring (27%)  
 440 was more than in fall (19%; [Government of Newfoundland Labrador 2017](#)).

441 Using all the TCAR reports from the [Government of Newfoundland and Labrador \(2020-2021\)](#), we estimated  
 442 a correction factor,  $\alpha_{CA,1}(t)$  (see Table A2 for notation), to calculate the total travelers (air and auto/ferry)  
 443 originating from Canada from the air arrival data (IATA,  $s = 1$ ). The estimated value multiplies the travel volume  
 444 by air from Canadian origins and is 1.24 for September, October, November, and March, 1.14 for winter months  
 445 (December, January, and February) and 1.37 for warmer months in spring and summer (April to August). For  
 446 international arrivals, this correction for arrivals by auto/ferry is not necessary owing to the Frontier Counts data  
 447 ( $s = 3$ ), which reports arrivals by all travel modes.

**Table A2** Parameter values used to estimate the total travel volume arriving in Newfoundland and Labrador from Canadian ( $i = CA$ ) and international ( $i = INT$ ) origins. Data sources are: IATA ( $s = 1$ ); TDF ( $s = 2$ ); and FC ( $s = 3$ ).

| Symbol             | Description                                                                                                                                                                    | Value                                                                                                                                                                                                                                                                                                                                                             |
|--------------------|--------------------------------------------------------------------------------------------------------------------------------------------------------------------------------|-------------------------------------------------------------------------------------------------------------------------------------------------------------------------------------------------------------------------------------------------------------------------------------------------------------------------------------------------------------------|
| $Z_{i,s}(t)$       | Number of travellers arriving from origin $i$ as reported by data source $s$                                                                                                   | See Figure 2A. For the FC data ( $s = 3$ ) we just have $i = INT$ .                                                                                                                                                                                                                                                                                               |
| $\alpha_{i,s}(t)$  | Correction factor to estimate travellers by modes other than air                                                                                                               | Values vary for different time periods with complete details in Table A4. $\alpha_{CA,1}(t)$ values are between 0.14 and 0.37, which means that travel volumes increase by 14-37% when the exclusions are considered. $\alpha_{INT,1}(t)$ was determined based on the FC data ( $s = 3$ ) as this data reported arrivals for international origins for all modes. |
| $\lambda_{i,s}(t)$ | For the IATA data ( $s = 1$ ) excluded travellers are domestic crew members. For the TDF data ( $s = 2$ ) exempt travelers are crew, NL residents, and other exempt travellers | Values vary monthly with complete details in Table A4. $\lambda_{CA,1}(t)$ is between 2,107 and 24,952, $\lambda_{CA,2}(t)$ is between 5,863 and 15,048, and $\lambda_{INT,2}(t)$ is between 1,916 and 5,620 travellers excluded each month.                                                                                                                      |
| $h_i^{tot}(t)$     | Fraction of travellers from each Canadian province and territory                                                                                                               | Values vary monthly with complete details in Table A4.                                                                                                                                                                                                                                                                                                            |
| $h_i^{rw}$         | Fraction of rotational workers from each Canadian province or territory                                                                                                        | Assumed not to vary over time with values reported in Table A4.                                                                                                                                                                                                                                                                                                   |

### 448 A.4.2 Crew members and exempt travelers

449 Monthly crew member travel volume from international origins was obtained from the Frontier Counts data source  
 450 ( $s = 3$ ) both before and during the pandemic. The number of travelers per month that were crew members from  
 451 Canadian origins is assumed to be 2.5 times the volume of crew members from international origins.

452 Travel declaration forms data ( $s = 2$ ) reported arriving travel volume each day from Canadian or international  
 453 origins during the pandemic. TDF data does not consider travelers who were exempt from completing the form

(see Table 1 in the main text, and Section A.2). We were able to estimate the correction for excluded travelers for each month and assumed an equal number of excluded travelers arrived each day during that month.

To estimate the number of exempt travelers from international origins, we compared the two data sources: TDF ( $s = 2$ ) and IATA ( $s = 3$ ). Since  $Z_{INT,3}$  included all international arrivals, the difference between this data source and  $Z_{INT,2}$  is the number of international exempt travelers per month,  $\lambda_{INT,2}(t)$ .

Travelers from Canada exempt from filling out a TDF were interprovincial workers, NL residents, domestic crew members, and exempt travelers via the Labrador-Québec border (see Section A.2). The correction applied to the TDF data source, where  $\lambda_{CA,2}(t)$  accounts for the exclusion of both domestic crew members and other exempt travelers. To estimate the portion of other arriving exempt travelers (not crew), we assumed that the number of total exempt arrivals (residents and non-residents) was 2.4 times the number of exempt non-NL resident arrivals (see Aleman et al 2021 for a justification of this assumption), where the number of exempt non-NL resident arrivals from domestic origins is assumed to equal the number of exempt non-NL residents arriving from international origins per month. This value of 2.4 may be an over-estimate, but this over-estimate compensates for underestimation for other reasons such as challenges in submitting the TDF for travelers arriving by land.

## A.5 Percentage of travelers arriving from different origins

The TDF data (during the pandemic) was used to estimate the monthly percentage of travelers originating from each country (international travel volume) arriving to Newfoundland and Labrador during the pandemic (Table A3). These values show that the United States comprises most arrivals from international origins, implying that our assumption that infection prevalence for international arrivals is equal to infection prevalence in the United States is reasonable.

**Table A3:** Percentage of travel volume from international origins during the COVID-19 pandemic, September 2020 to May 2021

| Origins             | 2020-09 | 2020-10 | 2020-11 | 2020-12 | 2021-01 | 2021-02 | 2021-03 | 2021-04 | 2021-05 |
|---------------------|---------|---------|---------|---------|---------|---------|---------|---------|---------|
| Argentina           | 0.000   | 0.000   | 0.000   | 0.000   | 0.000   | 0.000   | 0.000   | 0.153   | 0.000   |
| Mauritius           | 0.000   | 0.000   | 0.000   | 0.000   | 0.305   | 0.377   | 0.000   | 0.000   | 0.118   |
| Mexico              | 0.000   | 7.692   | 0.000   | 2.336   | 1.829   | 2.264   | 0.615   | 1.227   | 1.294   |
| Montenegro          | 0.000   | 0.000   | 0.000   | 0.000   | 0.000   | 0.000   | 0.000   | 0.153   | 0.000   |
| Morocco             | 0.000   | 0.000   | 0.000   | 0.000   | 0.000   | 0.000   | 0.000   | 0.000   | 0.235   |
| Moszenbeque         | 0.000   | 0.000   | 0.000   | 0.000   | 0.000   | 0.000   | 0.205   | 0.000   | 0.000   |
| Mozambique          | 0.000   | 0.000   | 0.000   | 0.000   | 0.305   | 0.000   | 0.000   | 0.000   | 0.118   |
| Myanmar             | 0.000   | 0.000   | 0.000   | 0.000   | 0.000   | 0.000   | 0.000   | 0.000   | 0.118   |
| Namibia             | 0.000   | 0.000   | 0.000   | 0.234   | 0.000   | 0.000   | 0.205   | 0.000   | 0.000   |
| Nepal               | 0.000   | 0.000   | 0.000   | 0.000   | 0.000   | 0.755   | 0.000   | 0.000   | 0.235   |
| Netherlands         | 0.000   | 0.000   | 0.990   | 0.935   | 0.610   | 0.000   | 1.230   | 1.687   | 1.176   |
| New Zealand         | 0.000   | 1.923   | 0.000   | 0.000   | 0.610   | 0.000   | 0.000   | 0.000   | 0.000   |
| Nigeria             | 0.000   | 1.923   | 0.000   | 1.402   | 1.524   | 3.019   | 1.434   | 1.994   | 1.529   |
| Norway              | 0.000   | 1.923   | 7.921   | 2.804   | 3.659   | 2.264   | 1.639   | 2.301   | 1.412   |
| Oman                | 0.000   | 0.000   | 0.000   | 0.467   | 0.000   | 0.000   | 0.000   | 0.153   | 0.118   |
| Pakistan            | 0.000   | 0.000   | 0.000   | 0.467   | 0.610   | 1.509   | 1.434   | 0.307   | 0.000   |
| Panama              | 0.000   | 0.000   | 0.990   | 0.000   | 0.000   | 0.000   | 0.000   | 0.153   | 0.000   |
| Papua New Guinea    | 0.000   | 1.923   | 0.000   | 0.000   | 0.000   | 0.755   | 0.000   | 0.000   | 0.000   |
| Australia           | 0.000   | 0.000   | 0.000   | 0.701   | 0.305   | 0.377   | 0.410   | 0.767   | 0.588   |
| Peru                | 0.000   | 0.000   | 0.000   | 0.000   | 0.000   | 0.000   | 0.000   | 0.000   | 0.353   |
| Philippines         | 0.000   | 1.923   | 0.000   | 4.439   | 0.915   | 1.887   | 1.434   | 4.755   | 2.000   |
| Poland              | 0.000   | 0.000   | 0.000   | 0.234   | 0.305   | 0.000   | 1.639   | 0.307   | 2.588   |
| Portugal            | 0.000   | 0.000   | 0.000   | 0.234   | 0.915   | 0.000   | 0.410   | 0.614   | 0.235   |
| Qatar               | 0.000   | 0.000   | 0.000   | 1.869   | 0.305   | 3.019   | 0.205   | 1.074   | 1.412   |
| Romania             | 0.000   | 0.000   | 0.000   | 0.234   | 0.305   | 0.000   | 0.205   | 0.153   | 0.235   |
| Russia              | 0.000   | 0.000   | 0.000   | 0.234   | 0.000   | 0.377   | 0.410   | 0.460   | 0.824   |
| Rwanda              | 0.000   | 0.000   | 0.000   | 0.000   | 0.000   | 0.377   | 0.205   | 0.307   | 0.000   |
| Saudi Arabia        | 0.000   | 1.923   | 0.000   | 1.402   | 1.220   | 1.509   | 0.205   | 0.614   | 0.824   |
| Austria             | 0.000   | 0.000   | 0.000   | 0.234   | 0.610   | 0.000   | 0.000   | 0.000   | 0.118   |
| Scotland            | 0.000   | 3.846   | 0.990   | 0.935   | 0.610   | 1.132   | 2.254   | 3.067   | 0.000   |
| Serbia              | 0.000   | 0.000   | 0.000   | 0.000   | 0.000   | 0.000   | 0.205   | 0.153   | 0.118   |
| Singapore           | 0.000   | 0.000   | 0.000   | 0.234   | 0.000   | 0.755   | 0.000   | 0.153   | 0.471   |
| Sint Maarten        | 0.000   | 0.000   | 0.000   | 0.000   | 0.000   | 0.000   | 0.000   | 0.153   | 0.000   |
| Slovenia            | 0.000   | 0.000   | 0.000   | 0.000   | 0.610   | 0.000   | 0.000   | 0.000   | 0.000   |
| South Africa        | 0.000   | 0.000   | 0.000   | 0.000   | 0.000   | 1.132   | 1.025   | 0.460   | 0.235   |
| South Korea         | 0.000   | 0.000   | 0.000   | 0.000   | 0.000   | 0.377   | 0.000   | 0.153   | 0.000   |
| Azerbaijan          | 0.000   | 0.000   | 0.000   | 0.234   | 0.000   | 0.000   | 0.410   | 0.000   | 0.353   |
| Spain               | 0.000   | 3.846   | 0.990   | 3.738   | 3.354   | 2.642   | 0.615   | 1.380   | 4.235   |
| Srilanka            | 0.000   | 0.000   | 0.990   | 0.234   | 0.610   | 1.509   | 0.615   | 0.153   | 0.471   |
| St Kitts and Nevis  | 0.000   | 0.000   | 0.000   | 0.000   | 0.000   | 0.000   | 0.000   | 0.153   | 0.000   |
| Suriname            | 0.000   | 0.000   | 0.000   | 0.935   | 0.305   | 0.755   | 1.434   | 14.877  | 0.000   |
| Sweden              | 0.000   | 1.923   | 0.000   | 0.234   | 0.000   | 0.000   | 0.000   | 0.460   | 0.235   |
| Switzerland         | 0.000   | 0.000   | 0.000   | 0.234   | 0.305   | 0.000   | 0.615   | 0.000   | 0.235   |
| Taiwan              | 0.000   | 1.923   | 0.000   | 0.234   | 0.000   | 0.377   | 0.000   | 0.000   | 0.235   |
| Tanzania            | 0.000   | 0.000   | 0.000   | 0.000   | 0.305   | 1.132   | 0.000   | 0.000   | 0.353   |
| Thailand            | 0.000   | 0.000   | 0.000   | 0.000   | 0.305   | 0.000   | 0.000   | 0.153   | 8.235   |
| Trinidad and Tobago | 0.000   | 0.000   | 0.990   | 0.935   | 2.439   | 2.642   | 1.230   | 2.147   | 1.647   |
| Tunisia             | 0.000   | 0.000   | 0.000   | 0.000   | 0.000   | 0.000   | 0.000   | 0.000   | 0.118   |
| Turkey              | 0.000   | 0.000   | 0.000   | 0.467   | 1.220   | 1.132   | 0.205   | 0.920   | 0.000   |
| UAE                 | 0.000   | 1.923   | 0.000   | 0.234   | 0.915   | 0.000   | 0.410   | 1.227   | 0.588   |

Continued on next page

Table A3 – continued from previous page

| International Origins  | 2020-09 | 2020-10 | 2020-11 | 2020-12 | 2021-01 | 2021-02 | 2021-03 | 2021-04 | 2021-05 |
|------------------------|---------|---------|---------|---------|---------|---------|---------|---------|---------|
| UK                     | 16.667  | 13.462  | 16.832  | 10.047  | 9.451   | 7.925   | 3.074   | 2.607   | 11.059  |
| Bangladesh             | 0.000   | 0.000   | 0.000   | 1.636   | 2.439   | 6.038   | 3.074   | 1.227   | 3.529   |
| Ukraine                | 0.000   | 0.000   | 0.000   | 0.000   | 0.610   | 0.000   | 0.000   | 0.153   | 0.353   |
| USA                    | 50.000  | 44.231  | 48.515  | 36.682  | 32.012  | 24.151  | 39.139  | 30.675  | 32.706  |
| Uzbekistan             | 0.000   | 0.000   | 0.000   | 0.000   | 0.000   | 0.000   | 0.000   | 0.000   | 0.118   |
| Vietnam                | 0.000   | 1.923   | 0.000   | 0.000   | 0.610   | 0.000   | 0.000   | 0.000   | 0.118   |
| Wales                  | 0.000   | 0.000   | 0.000   | 0.000   | 0.000   | 0.000   | 0.410   | 0.000   | 0.000   |
| Zambia                 | 0.000   | 0.000   | 0.000   | 0.000   | 0.000   | 0.000   | 0.000   | 0.153   | 0.235   |
| Zimbabwe               | 0.000   | 0.000   | 0.000   | 0.000   | 0.305   | 0.377   | 0.205   | 0.307   | 0.235   |
| Barbados               | 0.000   | 0.000   | 0.990   | 0.000   | 0.000   | 0.377   | 0.000   | 0.307   | 0.118   |
| Belgium                | 0.000   | 0.000   | 0.000   | 0.000   | 0.000   | 0.000   | 0.205   | 0.000   | 0.000   |
| Belize                 | 0.000   | 0.000   | 0.000   | 0.467   | 0.000   | 0.000   | 0.205   | 0.153   | 0.118   |
| Benin                  | 0.000   | 0.000   | 0.000   | 0.000   | 0.305   | 0.000   | 0.000   | 0.000   | 0.000   |
| Bermuda                | 0.000   | 0.000   | 0.000   | 0.234   | 0.000   | 0.377   | 0.000   | 0.000   | 0.000   |
| Bolivia                | 0.000   | 0.000   | 0.000   | 0.000   | 0.000   | 0.377   | 0.000   | 0.000   | 0.000   |
| Bosnia and Herzegovina | 0.000   | 0.000   | 0.000   | 0.000   | 0.000   | 0.000   | 0.000   | 0.153   | 0.000   |
| Botswana               | 0.000   | 0.000   | 0.000   | 0.000   | 0.000   | 0.377   | 0.000   | 0.000   | 0.000   |
| Brazil                 | 8.333   | 0.000   | 0.990   | 1.168   | 2.744   | 1.509   | 1.434   | 1.227   | 0.588   |
| Brunei                 | 0.000   | 0.000   | 0.000   | 0.234   | 0.000   | 0.377   | 0.205   | 0.000   | 0.118   |
| Bulgaria               | 0.000   | 0.000   | 0.000   | 0.000   | 0.000   | 0.000   | 0.410   | 0.153   | 0.235   |
| Cameroon               | 0.000   | 0.000   | 0.000   | 0.000   | 0.000   | 0.377   | 0.410   | 0.000   | 0.235   |
| Cape Verde             | 0.000   | 0.000   | 0.000   | 0.000   | 0.000   | 0.000   | 0.000   | 0.307   | 0.000   |
| Caribbean              | 0.000   | 0.000   | 0.000   | 1.402   | 0.610   | 0.377   | 0.205   | 0.460   | 1.294   |
| Chad                   | 0.000   | 0.000   | 0.000   | 0.000   | 0.305   | 0.000   | 0.000   | 0.000   | 0.000   |
| Chile                  | 0.000   | 0.000   | 0.000   | 0.000   | 0.610   | 0.377   | 0.000   | 0.000   | 0.000   |
| China                  | 8.333   | 0.000   | 0.000   | 0.935   | 0.610   | 0.755   | 0.615   | 0.920   | 1.294   |
| Colombia               | 0.000   | 0.000   | 0.000   | 0.000   | 0.610   | 0.000   | 0.000   | 0.153   | 0.118   |
| Congo DRC              | 0.000   | 0.000   | 0.000   | 0.000   | 0.000   | 0.000   | 0.000   | 0.000   | 0.353   |
| Costa Rica             | 0.000   | 0.000   | 0.000   | 0.234   | 0.305   | 0.000   | 0.000   | 0.000   | 0.235   |
| Croatia                | 0.000   | 0.000   | 0.000   | 0.000   | 0.000   | 0.000   | 0.000   | 1.227   | 0.353   |
| Africa                 | 0.000   | 0.000   | 0.000   | 0.234   | 0.305   | 0.755   | 0.205   | 0.153   | 0.000   |
| Cuba                   | 0.000   | 0.000   | 0.000   | 0.234   | 0.305   | 0.000   | 0.000   | 0.000   | 0.000   |
| Czech Republic         | 0.000   | 0.000   | 0.000   | 0.000   | 0.000   | 0.000   | 0.000   | 0.000   | 0.118   |
| Denmark                | 0.000   | 0.000   | 0.990   | 0.467   | 0.610   | 1.509   | 0.410   | 0.307   | 1.059   |
| Dominican Republic     | 0.000   | 0.000   | 0.000   | 0.467   | 0.305   | 0.000   | 0.000   | 0.000   | 0.235   |
| Ecuador                | 0.000   | 0.000   | 0.000   | 0.000   | 0.000   | 0.000   | 0.205   | 0.000   | 0.235   |
| Egypt                  | 8.333   | 0.000   | 1.980   | 0.234   | 1.220   | 0.755   | 0.615   | 0.920   | 0.824   |
| El Salvador            | 0.000   | 0.000   | 0.000   | 0.234   | 0.000   | 0.000   | 0.000   | 0.000   | 0.000   |
| Albania                | 0.000   | 0.000   | 0.990   | 0.000   | 0.000   | 0.000   | 0.205   | 0.000   | 0.000   |
| Ethiopia               | 0.000   | 0.000   | 0.000   | 0.000   | 0.000   | 0.000   | 0.000   | 0.614   | 0.000   |
| Faroe Islands          | 0.000   | 0.000   | 0.000   | 0.000   | 0.000   | 0.377   | 0.205   | 0.000   | 0.471   |
| Finland                | 0.000   | 0.000   | 0.000   | 0.234   | 0.000   | 0.377   | 0.205   | 0.000   | 0.118   |
| France                 | 0.000   | 1.923   | 1.980   | 1.402   | 2.744   | 0.755   | 13.320  | 1.227   | 0.588   |
| Gabon                  | 0.000   | 0.000   | 0.000   | 0.000   | 0.000   | 0.000   | 0.205   | 0.000   | 0.000   |
| Germany                | 0.000   | 0.000   | 2.970   | 1.168   | 0.610   | 1.132   | 1.639   | 1.074   | 0.471   |
| Ghana                  | 0.000   | 0.000   | 0.000   | 0.234   | 0.610   | 2.264   | 0.410   | 0.614   | 0.235   |
| Greece                 | 0.000   | 0.000   | 0.990   | 0.234   | 0.000   | 0.000   | 0.205   | 0.153   | 0.118   |
| Guatemala              | 0.000   | 0.000   | 0.000   | 0.000   | 0.000   | 0.000   | 0.205   | 0.000   | 0.118   |
| Guyana                 | 8.333   | 0.000   | 0.000   | 3.037   | 3.963   | 1.132   | 1.844   | 1.687   | 1.294   |
| Holland                | 0.000   | 0.000   | 0.000   | 0.000   | 0.000   | 0.000   | 0.000   | 0.307   | 0.000   |
| Honduras               | 0.000   | 0.000   | 0.000   | 0.000   | 0.000   | 0.000   | 0.000   | 0.153   | 0.000   |
| Hong Kong              | 0.000   | 0.000   | 0.000   | 0.000   | 0.000   | 0.000   | 0.000   | 0.153   | 0.118   |
| Hungary                | 0.000   | 0.000   | 0.000   | 0.234   | 0.000   | 0.000   | 0.000   | 0.153   | 0.118   |
| Iceland                | 0.000   | 0.000   | 2.970   | 0.467   | 0.305   | 0.755   | 0.000   | 0.614   | 0.118   |
| India                  | 0.000   | 0.000   | 0.990   | 2.804   | 1.524   | 4.906   | 3.484   | 3.221   | 0.471   |
| Indonesia              | 0.000   | 0.000   | 0.000   | 0.467   | 0.000   | 0.000   | 0.000   | 0.153   | 0.118   |
| Amsterdam              | 0.000   | 0.000   | 0.000   | 0.234   | 0.000   | 0.000   | 0.000   | 0.000   | 0.000   |
| Iran                   | 0.000   | 0.000   | 0.000   | 0.935   | 3.963   | 3.019   | 0.205   | 1.074   | 1.176   |
| Iraq                   | 0.000   | 0.000   | 0.000   | 0.000   | 0.305   | 0.000   | 0.000   | 0.000   | 0.000   |
| Ireland                | 0.000   | 0.000   | 1.980   | 2.103   | 1.829   | 1.132   | 0.820   | 0.920   | 1.294   |
| Israel                 | 0.000   | 0.000   | 0.000   | 0.467   | 0.000   | 0.000   | 0.000   | 0.153   | 0.000   |
| Italy                  | 0.000   | 5.769   | 0.990   | 0.000   | 0.305   | 1.132   | 0.615   | 0.000   | 0.235   |
| Jamaica                | 0.000   | 0.000   | 0.990   | 0.467   | 0.305   | 0.000   | 1.434   | 0.614   | 0.588   |
| Japan                  | 0.000   | 0.000   | 0.000   | 0.000   | 0.305   | 0.000   | 0.000   | 0.614   | 0.706   |
| Jordan                 | 0.000   | 0.000   | 0.000   | 0.467   | 0.610   | 0.755   | 0.615   | 0.000   | 0.471   |
| Kazakhstan             | 0.000   | 0.000   | 0.000   | 0.467   | 0.000   | 1.132   | 0.000   | 0.460   | 0.118   |
| Kenya                  | 0.000   | 0.000   | 0.000   | 0.467   | 0.305   | 0.377   | 0.410   | 0.153   | 0.235   |
| Angola                 | 0.000   | 0.000   | 0.990   | 1.402   | 0.610   | 0.755   | 1.434   | 0.920   | 0.353   |
| Kosovo                 | 0.000   | 0.000   | 0.000   | 0.000   | 0.000   | 0.377   | 0.000   | 0.000   | 0.000   |
| Kuwait                 | 0.000   | 0.000   | 0.000   | 0.000   | 1.220   | 0.000   | 0.000   | 0.153   | 0.235   |
| Kyrgyzstan             | 0.000   | 0.000   | 0.000   | 0.000   | 0.000   | 0.000   | 0.000   | 0.000   | 0.118   |
| Latin America          | 0.000   | 0.000   | 0.000   | 0.000   | 0.000   | 0.000   | 0.000   | 0.000   | 0.235   |
| Latvia                 | 0.000   | 0.000   | 0.000   | 0.701   | 0.000   | 0.000   | 0.205   | 0.000   | 0.000   |
| Lebanon                | 0.000   | 0.000   | 0.000   | 0.000   | 0.305   | 0.000   | 0.205   | 0.153   | 0.118   |
| Libya                  | 0.000   | 0.000   | 0.000   | 0.000   | 0.000   | 0.000   | 0.000   | 0.000   | 0.118   |
| Lithuania              | 0.000   | 0.000   | 0.000   | 0.000   | 0.000   | 0.000   | 0.000   | 0.000   | 0.118   |
| Antigua & Barbuda      | 0.000   | 0.000   | 0.000   | 0.000   | 0.305   | 0.000   | 0.000   | 0.000   | 0.000   |
| Luxembourg             | 0.000   | 0.000   | 0.000   | 0.000   | 0.000   | 0.000   | 0.000   | 0.000   | 0.118   |
| Malaga                 | 0.000   | 0.000   | 0.000   | 0.000   | 0.000   | 0.000   | 0.000   | 0.153   | 0.000   |
| Malawi                 | 0.000   | 0.000   | 0.000   | 0.000   | 0.000   | 0.000   | 0.000   | 0.153   | 0.000   |
| Malaysia               | 0.000   | 0.000   | 0.000   | 0.234   | 0.000   | 0.755   | 0.000   | 0.000   | 0.471   |
| Martinique             | 0.000   | 0.000   | 0.000   | 0.000   | 0.000   | 0.000   | 0.205   | 0.000   | 0.000   |
| Mauritania             | 0.000   | 0.000   | 0.000   | 0.000   | 0.305   | 0.000   | 0.000   | 0.000   | 0.000   |

474

475 The percentage of travel volume for each province or the territories from the IATA (before the pandemic) and TDF  
 476 (during the pandemic) data was used to estimate the percentage of regular travelers arriving from each of these  
 477 origins (Table A4).

478 The percentage of NL residents that are interprovincial employees working in each Canadian province or the  
 479 territories is reported by [Hewitt et al 2018](#). In this report, the largest number of NL residents that are interprovincial

**Table A4** Values for the parameters in table A2.  $h_i^{tot}(t)$  (per month) is the fraction of Canadian travel volume that originates from each individual province or the territories.  $\alpha_{CA,1}(t)$  is the correction factor to estimate the number of travellers arriving from Canada by modes other than air before the pandemic.  $\lambda_{CA,1}(t)$  is the number of excluded travellers for data source  $s = 1$  per month (pre-pandemic) whereas  $\lambda_{CA,2}(t)$  and  $\lambda_{INT,2}(t)$  are the monthly number of Canadian and international excluded travelers from data source  $s = 2$  (during the pandemic).  $h_i^{rw}$  is the fraction of rotational workers from each Canadian province and territory.

| Date           | $h_i^{tot}(\%)$ |       |      |      |       |       |      |      |      |      |      | $\alpha_{CA,1}(t)$ | $\lambda_{CA,1}(t)$ | $\lambda_{CA,2}(t)$ | $\lambda_{INT,2}(t)$ |
|----------------|-----------------|-------|------|------|-------|-------|------|------|------|------|------|--------------------|---------------------|---------------------|----------------------|
|                | ON              | QC    | MB   | NB   | AB    | NS    | BC   | SK   | PEI  | TR   |      | CA                 | CA                  | CA                  | INT                  |
| 2019-01        | 31.69           | 24.35 | 0.58 | 3.5  | 8.82  | 27.15 | 2.16 | 0.52 | 1.03 | 0.2  | 0.14 | 2920               |                     |                     |                      |
| 2019-02        | 32.05           | 25.84 | 0.68 | 3.79 | 7.52  | 26.88 | 2    | 0.44 | 0.61 | 0.21 | 0.14 | 2417               |                     |                     |                      |
| 2019-03        | 33.07           | 24.07 | 0.75 | 3.73 | 6.99  | 27.97 | 2.29 | 0.29 | 0.49 | 0.35 | 0.24 | 3642               |                     |                     |                      |
| 2019-04        | 33.8            | 22.96 | 0.72 | 3.97 | 7.72  | 27.03 | 2.09 | 0.6  | 0.75 | 0.36 | 0.37 | 3150               |                     |                     |                      |
| 2019-05        | 37.07           | 17.07 | 1.07 | 3.7  | 7.88  | 28.66 | 2.64 | 0.87 | 0.69 | 0.34 | 0.37 | 4750               |                     |                     |                      |
| 2019-06        | 42.03           | 13.73 | 1.49 | 3.23 | 9.74  | 23.9  | 4.1  | 0.58 | 0.68 | 0.53 | 0.37 | 5702               |                     |                     |                      |
| 2019-07        | 45.19           | 11.03 | 1.37 | 2.7  | 13.31 | 20.21 | 4.3  | 0.94 | 0.54 | 0.41 | 0.37 | 14075              |                     |                     |                      |
| 2019-08        | 44.14           | 11.81 | 1.17 | 2.83 | 10.7  | 22.29 | 4.67 | 1.22 | 0.73 | 0.45 | 0.37 | 6650               |                     |                     |                      |
| 2019-09        | 38.38           | 16.25 | 1.5  | 3.55 | 8.26  | 26.09 | 3.76 | 0.92 | 0.93 | 0.36 | 0.24 | 24952              |                     |                     |                      |
| 2019-10        | 33.86           | 19.34 | 1.1  | 3.33 | 9.14  | 28.6  | 2.9  | 0.47 | 0.73 | 0.52 | 0.24 | 9395               |                     |                     |                      |
| 2019-11        | 33.32           | 18.8  | 0.55 | 3.99 | 8.1   | 30.33 | 2.84 | 0.52 | 1.1  | 0.44 | 0.24 | 2842               |                     |                     |                      |
| 2019-12        | 34.95           | 14.93 | 0.9  | 4.05 | 10.99 | 27.68 | 4.4  | 0.59 | 0.8  | 0.7  | 0.14 | 2445               |                     |                     |                      |
| 2020-01        | 35.01           | 16.69 | 0.78 | 4.39 | 9.57  | 28.1  | 3.87 | 0.62 | 0.7  | 0.27 | 0.14 | 2107               |                     |                     |                      |
| 2020-02        | 33.33           | 19.82 | 0.78 | 4.44 | 7.73  | 28.01 | 4.03 | 0.42 | 0.93 | 0.52 | 0.14 | 2412               |                     |                     |                      |
| 2020-03        | 33.75           | 16.37 | 0.91 | 3.97 | 7.17  | 31.26 | 4.43 | 0.62 | 0.85 | 0.67 | 0.24 | 2252               |                     |                     |                      |
| 2020-09        | 23.78           | 3.72  | 0.72 | 4.45 | 9.31  | 52.64 | 2.38 | 0.52 | 1.24 | 1.24 |      |                    | 15048               | 5620                |                      |
| 2020-10        | 28.09           | 3.4   | 0.66 | 4.57 | 14.47 | 41.14 | 3.25 | 1.02 | 1.52 | 1.88 |      |                    | 13838               | 4669                |                      |
| 2020-11        | 25.7            | 4.86  | 0.69 | 5.49 | 16.38 | 39.38 | 4.81 | 0.54 | 0.74 | 1.42 |      |                    | 10827               | 3399                |                      |
| 2020-12        | 28.62           | 5.57  | 2.26 | 3.99 | 24.29 | 17.04 | 9.54 | 1.08 | 1.41 | 6.2  |      |                    | 6941                | 2231                |                      |
| 2021-01        | 30.1            | 7.17  | 1.16 | 5.27 | 22.84 | 20.55 | 7.01 | 0.69 | 0.61 | 4.61 |      |                    | 5863                | 1916                |                      |
| 2021-02        | 26.92           | 7.22  | 1.93 | 3.16 | 27.36 | 16.16 | 8.25 | 1.03 | 0.79 | 7.18 |      |                    | 6548                | 2144                |                      |
| 2021-03        | 28.41           | 10.07 | 1.9  | 3.15 | 25.88 | 12.75 | 8.74 | 1.33 | 0.68 | 7.1  |      |                    | 6831                | 2238                |                      |
| 2021-04        | 28.02           | 7.2   | 1.47 | 3.49 | 26.15 | 15.59 | 9.21 | 1.16 | 0.71 | 7    |      |                    | 9845                | 3096                |                      |
| 2021-05        | 28.18           | 6.98  | 1.53 | 3.58 | 27.92 | 14.68 | 8.37 | 1.67 | 1.11 | 5.98 |      |                    | 9065                | 2841                |                      |
| $h_i^{rw}(\%)$ | 15              | 2     | 1    | 4    | 57    | 8     | 4    | 2    | 2    | 5    |      |                    |                     |                     |                      |

480 employees work in Alberta (57%), followed by Ontario (15%) and Nova Scotia (8%). These values are used to  
 481 estimate the within-Canada origin of rotational workers (Table A4).

## 482 A.6 Estimating total travel volume

We estimated the total travel volume (see Section 2.2.1 of the main text for a definition) arriving in NL by considering three data sources: International Air Travel Association ( $s = 1$ ), Travel Declaration Forms ( $s = 2$ ), and Frontier Counts ( $s = 3$ ) each with limitations, and each reported for different time periods (Table 1). We estimate the total travel volume considering all travel modes, travelers and crew, from the origin  $i$  at time  $t$  by introducing indicator variables that correct for exclusions in the data sources,

$$V_{i,s}(t) = (1 + \alpha_{i,s}(t) \mathbb{1}_{\text{MODES}}) Z_{i,s}(t) + \lambda_{i,s}(t) \mathbb{1}_{\text{EXCL}}, \quad (\text{A1})$$

483 where  $Z_{i,s}(t)$  is the number of travelers arriving from origin  $i$  per day ( $s = 2$ ), or per month ( $s = 1, 3$ ) reported from  
 484 a data source,  $s$ . Possible origins are international ( $i = \text{INT}$ ) or Canada ( $i = \text{CA}$ ), but in subsequent calculations  
 485 below we will further partition  $i = \text{CA}$  into each Canadian province and the territories (where all three Canadian  
 486 territories are combined).

487 The indicator variable  $\mathbb{1}_{\text{MODES}}$  applies to data that does not report arrivals by all modes, and applies to the IATA  
 488 data ( $s = 1$ ) because this travel volume reports only arrivals by air. The correction factor,  $\alpha_{i,s}(t)$ , multiplies the  
 489 reported travel volume by air. The indicator variable  $\mathbb{1}_{\text{EXCL}}$  applies when some individuals are excluded from the  
 490 reported travel volume, and the correction is additive. This correction applies to the IATA data,  $\lambda_{i,1}(t)$ , for crew  
 491 members that are not reported, and to the TDF data,  $\lambda_{i,2}(t)$ , because arriving crew members on flights, ships,  
 492 commercial freighters, NL residents, and other exempt travelers are not reported in this data.

493 The travel volume,  $V_{i,s}(t)$ , corrected for reporting omissions, can be calculated for all data sources  $s$ ; however, in  
494 practice the calculated values do not have a lot of overlap because the IATA data only corresponds to pre-pandemic  
495 time periods, the TDF data only corresponds to during the pandemic, and the FC data only reports travelers of  
496 international origin.

497 In Equation (A1),  $i$  refers to the Canadian or international origin of travel, but both the IATA and TDF data  
498 report the Canadian province or territory of origin. Therefore, we estimate travel volume from different Canadian  
499 provinces and the territories as,

$$v_{i,s}(t) = V_{CA,s}(t)h_i^{tot}(t), \quad (\text{A2})$$

500 where  $h_i^{tot}(t)$  is the fraction of all Canadian travelers originating from each of the different non-NL provinces or the  
501 territories  $i \in \{BC, AB, SK, MB, ON, QC, NB, NS, PE, TR\}$  on a given date  $t$ , where Yukon, Northwest territories,  
502 and Nunavut are combined and denoted as TR,  $s = 1$  corresponds to the IATA data when we are considering times  
503 before the pandemic, and  $s = 2$  corresponds to the TDF data when we are considering times during the pandemic.

504 During the public health emergency in NL, different travel restrictions were applied to rotational workers. Rotational  
505 workers are NL residents who work in other provinces. The number of rotational workers entering NL is difficult  
506 to estimate, but [Martignoni et al \(2022\)](#) estimates that 6,000 NL residents are rotational workers. If we assume a  
507 rotational worker has a set schedule of two weeks of work and home (alternating), then approximately 200 rotational  
508 workers will enter NL each day. The fraction of rotational workers that work in any given province or the Canadian  
509 territories,  $i \in \{BC, AB, SK, MB, ON, QC, NB, NS, PE, TR\}$ , is  $h_i^{rw}$ , which is estimated from [Hewitt et al \(2018\)](#)  
510 (see table A4). Therefore, the number of rotational workers arriving in NL during the pandemic from each of the  
511 different provinces and territories is,

$$v_i^{rw}(t) = 200h_i^{rw}. \quad (\text{A3})$$

512 The number of regular travelers (defined as all individuals that are not rotational workers) arriving from a Canadian  
513 origin,  $i$ , during the pandemic is,

$$v_i^r(t) = v_{CA,2}(t) - v_i^{rw}, \quad (\text{A4})$$

514 where the travel volume is estimated from the TDF data ( $s = 2$ ) because this data source corresponds to during  
515 the pandemic. The quantity  $v_i^{rw}(t)$  does not change with time, but  $v_i^r(t)$  does, so the dependence on time is written  
516 so that the compacted notation  $v_i^k(t)$  can be used. We define

$$v_i^r(t) = v_{INT,2}(t), \quad (\text{A5})$$

517 as the volume of regular travelers arriving from international origins during the pandemic, such that  $v_i^k(t)$  is the  
518 volume of travelers arriving during the pandemic at time,  $t$ , that are rotational workers ( $k = rw$ ,  $i = CA$ ), regular  
519 travelers arriving from a Canadian origin ( $k = r$ ,  $i = CA$ ), or from an international origin ( $k = r$ ,  $i = INT$ ).

## 520 Appendix B Estimating the infection status of departing travelers

521 The infection status of departing travelers indicates whether travelers are infected, and if infected, the number of  
522 days since exposure.

## 523 B.1 Infection prevalence at origin

### 524 B.1.1 Data sources - infection prevalence

525 The data source for new SARS-CoV-2 cases (incidence) was the Public Health Agency of Canada (PHAC) for the  
 526 Canadian provinces ([Public Health Infobase, 2020-2021](#)). We used the daily infection incidence in the United States  
 527 for all international travelers due to the lack of seroprevalence data for other countries. The Center for Systems  
 528 Science and Engineering (CSSE) at Johns Hopkins University was the data source for infection incidence in the  
 529 United States ([Dong et al, 2020](#)).

530 We used the method described in [Martignoni et al \(2023\)](#) to estimate the coefficient of under-reporting for COVID-  
 531 19 in region  $i$ , by considering the cumulative percentage of the population that was seropositive for SARS-CoV-2  
 532 antibodies relative to the number of reported COVID-19 cases in a region,  $i$ . We assumed the under-reporting  
 533 coefficient,  $u_i$ , for a given region did not change over time. The cumulative percentage of the population infected at  
 534 the end of September 2020 and May 2021 is determined from seroprevalence data ([Blood Donation Organizations, 2023](#);  
 535 [Centers for Disease Control and Prevention, 2020-2021](#)) and divided by the cumulative reported cases for each  
 536 region 13 days earlier because there are 9-12 days between symptom onset and seroconversion ([Lou et al, 2020](#)).  
 537 The under-reporting coefficient,  $u_i$ , is calculated as the difference in the percentage of the population infected as  
 538 estimated by the seroprevalence, divided by the difference in the percentage of the population reported as infected  
 539 (Table B5).

**Table B5** Under-reporting of COVID-19 cases.

| Region $i$ | Population $N_i$ | Cumulative reported cases to 2020-09-17 | Cumulative reported cases per capita to 2020-09-17 | Cumulative reported cases to 2021-05-16 | Cumulative reported cases per capita to 2021-05-16 | Seropositivity to 2020-09-30 | Seropositivity to 2021-05-29 | Estimated unreported cases per reported case |
|------------|------------------|-----------------------------------------|----------------------------------------------------|-----------------------------------------|----------------------------------------------------|------------------------------|------------------------------|----------------------------------------------|
| BC         | 5,071,336        | 7,663                                   | 0.151%                                             | 139,240                                 | 2.746%                                             | 0.5%                         | 3.099%                       | 1.002                                        |
| AB         | 4,371,316        | 16,274                                  | 0.372%                                             | 218,961                                 | 5.009%                                             | 0.69%                        | 5.27%                        | 0.988                                        |
| SK         | 1,174,462        | 1,757                                   | 0.150%                                             | 44,531                                  | 3.792%                                             | 0.14%                        | 4.32%                        | 1.148                                        |
| MB         | 1,369,465        | 1,500                                   | 0.110%                                             | 45,149                                  | 3.297%                                             | 1.45%                        | 5.37%                        | 1.230                                        |
| ON         | 14,566,547       | 45,676                                  | 0.314%                                             | 509,316                                 | 3.496%                                             | 0.85%                        | 4.1%                         | 1.021                                        |
| QC         | 8,484,965        | 66,356                                  | 0.782%                                             | 363,296                                 | 4.282%                                             | 1.23%                        | 4.84%                        | 1.032                                        |
| NB         | 776,827          | 194                                     | 0.025%                                             | 2,063                                   | 0.266%                                             | 0.159%                       | 0.172%                       | 0.054                                        |
| NS         | 971,395          | 1,086                                   | 0.112%                                             | 4,736                                   | 0.488%                                             | 0.16%                        | 0.23%                        | 0.186                                        |
| PEI        | 156,947          | 57                                      | 0.036%                                             | 191                                     | 0.122%                                             | 0.142%                       | 0.24%                        | 1.148                                        |
| TR         | 124,460          | 20                                      | 0.016%                                             | 829                                     | 0.666%                                             | 0.12%                        | 0.29%                        | 0.262                                        |
| USA        | 332,660,077      | 6,704,918                               | 2.016%                                             | 33,064,172                              | 9.939%                                             | 4.9%                         | 20.6%                        | 1.981                                        |

### 540 B.1.2 Estimating prevalence from incidence data

541 The travel volume from an origin is combined with the point prevalence at the traveler’s origin in our epidemiological  
 542 model. To estimate point prevalence at the origin, we first estimate the incidence proportion (number of new cases  
 543 divided by the population size) at a traveler’s origin,  $f_i(t)$ , on a day  $t$ , as

$$f_i(t) = \frac{c_i(t + t_d)u_i}{N_i}, \quad (\text{B6})$$

544 where  $c_i(t)$  is the number of new cases reported on day  $t$  at the origin  $i$ ,  $t_d = 11$  days is the delay between exposure  
 545 and reporting (we note that [Hendy et al 2021](#) reports this delay can be over 2 weeks),  $N_i$  is the population size  
 546 for each origin,  $i \in \{\text{INT, BC, AB, SK, MB, ON, QC, NB, NS, PE, TR}\}$  (based on 2021 values estimated from [Statistics Canada 2021](#) and [The United States government 2021](#)), and  $u_i$  is an origin-specific correction factor to account for  
 547 under-reporting.  
 548



**Table B6** Parameter values.

| Symbol        | Definition                                                                                                                                            | Value     | Reference                                                     |
|---------------|-------------------------------------------------------------------------------------------------------------------------------------------------------|-----------|---------------------------------------------------------------|
| $N_i$         | Population size for the travel origin, $i$ , in 2021. $i$ is each Canadian province except NL, and the Canadian territories and international origins | Table B5  | Statistics Canada (2021); The United States government (2021) |
| $u_i$         | Correction for infection under-reporting at origin $i$                                                                                                | Table B5  | App. B                                                        |
| $t_d$         | Delay between exposure and reporting at travellers origin                                                                                             | 11 days   | Assumed                                                       |
| $\lambda(a)$  | Probability of first developing symptoms given exposure $a$ days ago                                                                                  | Eq. (B10) | Lauer et al (2020)                                            |
| $t_{sens}(a)$ | Probability of a true positive given exposure $a$ days ago                                                                                            | App. B    | Hellewell et al (2021); Hurford et al (2023)                  |
| $\psi$        | Fraction of travelers who travel despite having symptoms                                                                                              | 0.75      | Smith et al (2020)                                            |
| $\rho$        | Fraction of infections that are symptomatic                                                                                                           | 0.69      | Godin et al (2021)                                            |
| $t_t$         | Date of arrival in NL                                                                                                                                 | All dates |                                                               |
| $P^S$         | Probability that symptomatic regular travellers get tested in NL                                                                                      | 0.8       | Assumed                                                       |
| $P_i^A$       | Proportion of all travelers that were infected on a flight, and were tested after exposure notifications were issued (Tab. C8)                        | 0.01      | App. B                                                        |
| $\bar{a}$     | Average number of days after arrival when symptoms first occur                                                                                        | 1 day     | See Eq. (C18). The exact value is 1.49 days                   |
| $t_e$         | Number of days after arrival when an exposure notifications was issued                                                                                | 3 days    | Assumed. Ranged between 2 and 7 days                          |
| $t_r$         | Delay between requesting a post-arrival test and the test occurring (for travellers without scheduled tests)                                          | 3 days    | Assumed                                                       |
| $t_{rep}$     | Delay between testing and reporting in NL                                                                                                             | 1 day     | Assumed                                                       |

549 We convert from incidence proportion to prevalence proportion (the proportion of the population that have infec-  
 550 tions at time  $t$ ) because we assume that the probability a traveler has an active infection at departure is equal to  
 551 infection prevalence proportion at their origin. We assume that individuals have active infections for 14 days, and  
 552 approximate point prevalence as  $14f_i(t)$ . This calculation is not exact. Indeed, suppose prevalence is increasing  
 553 until time  $t$ . Then at time  $t$ , more new infections than recoveries are occurring, so that point prevalence is actually  
 554 more than  $14f_i(t)$ ; the situation is reversed for for decreasing incidence.

### 555 B.1.3 Infection status of departing travelers

556 In addition to the probability that a traveler is infected, we also need to know the probability that the traveler was  
 557 exposed  $a$  days ago. We assume that the distribution of days since exposure of infected travelers at departure is  
 558 uniformly distributed between 13 and 0 days ago, i.e.,

$$n_i(t, a) = \begin{cases} 14 \frac{f_i(t)}{14} = f_i(t) & \text{for } a = 0, 1, 2, \dots, 13 \\ 0 & \text{otherwise,} \end{cases} \quad (\text{B7})$$

559 where  $a$  is the number of days since exposure or the ‘age of infection’. Again, this is an approximation because  
 560 if incidence is increasing at time  $t$ , there will be more individuals with recent exposures, so that the distribution  
 561 of age of infection is right-skewed (i.e., the tail is to the right as there relatively fewer individuals exposed many  
 562 days ago). An approximation is used because estimating the distribution of the ages of infection at any time from  
 563 reported data is difficult. Indeed, whether a case is reported depends on the age of the infection: tests are requested  
 564 once symptoms develop, test results can be false negatives, and both of these processes depend on the age of  
 565 infection. Due to the development of symptoms and pre-arrival testing, not all infected travelers end up traveling.  
 566 If a pre-arrival test was required, the rate of infected travelers arriving from origin  $i$  that were exposed  $a$  days ago is

$$T_i^{k,1}(t, a) = v_i^k(t)(1 - t_{sens}(a - 2))n_i(t, a), \quad (\text{B8})$$



567 where  $v_i^k(t)$  is the travel volume from origin  $i$  of rotational workers ( $k = rw$ ) or regular travelers ( $k = r$ ) who  
 568 departed on date  $t$  (see Eqs. (A3), (A4), and (A5)),  $1 - t_{sens}(a - 2)$  is the probability of a false negative test for  
 569 individuals exposed  $a$  days ago, where the test is assumed to occur 2 days before departure, when the infection  
 570 prevalence at  $i$  is  $n_i(t, a)$ . The complete details of how we parameterized the probability of true PCR test,  $t_{sens}(a)$ ,  
 571 are provided in Appendix B.

572 It is assumed that individuals with symptoms who receive a false negative test result on a pre-departure test still  
 573 travel. When no pre-departure test is required, some travelers do not travel due to symptoms. The rate at which  
 574 infected travelers that were exposed  $a$  days ago arrive from origin  $i$  when no pre-departure test is required is

$$T_i^{k,0}(t, a) = v_i^k(t) n_i(t, a) \rho \psi \Lambda(a), \quad (\text{B9})$$

575 where travelers develop symptoms with probability  $\rho$ , travel irrespective of symptoms with probability  $\psi$ , and first  
 576 develop symptoms before departure (when their infection age is  $a$  at departure) with probability  $\Lambda(a)$ , where

$$\Lambda(a) = \sum_{\alpha=0}^a \lambda(\alpha) \quad (\text{B10})$$

577 and,

$$\lambda(a) = \Gamma(a, \text{shape} = 5.807, \text{scale} = 0.948) \Delta a. \quad (\text{B11})$$

578 This parameterization is from [Lauer et al \(2020\)](#), and corresponds to the first symptoms occurring a mean of 5.5  
 579 days after exposure with a standard deviation of 2.3 days ([Hart et al, 2021](#)). The probability density is discretized  
 580 with  $\Delta a = 1$  day because other data for our model occurs only at 1 day intervals. The cumulative mass function Eq.  
 581 (B10) is used because travelers with infection age  $a$  that decided not to depart on date  $t$  may have first developed  
 582 symptoms at any time 0 to  $a$  days after exposure.

583 In Canada, a pre-arrival test policy for international travelers was enacted on January 7, 2021. Having a negative  
 584 COVID-19 test result (72 hours prior to departure) was required for travelers departing from international ports  
 585 ([Government of Canada, 2020](#)) and from May 15, 2021, it was necessary for all travelers ([Traveler COVID-19](#)  
 586 [Testing 2021](#), see Table C7). The rate that infected travelers arrived in NL with an infection of age  $a$  is

$$T_i^k(t, a) = \mathbb{1}_{\text{PRE},i}^k(t) T_i^{k,1}(t, a) + (1 - \mathbb{1}_{\text{PRE},i}^k(t)) T_i^{k,0}(t, a), \quad (\text{B12})$$

587 where  $\mathbb{1}_{\text{PRE},i}^k(t)$  is an indicator variable that is equal to 1 if a pre-departure test is required for travelers of type  $k$ ,  
 588 departing from origin  $i$  at time  $t$ , and 0 otherwise.

## 590 Appendix C Post-arrival testing to identify travel-related cases

### 590 C.1 Testing of rotational workers

591 The final component of the epidemiological model is post-arrival testing, in order to compare our predictions with  
 592 the reported number of travel-related cases in NL. From the early stages of the pandemic, there were specific post-  
 593 arrival testing measures that applied to rotational workers (see Table C7). We define the number of rotational  
 594 workers that test positive on their first post-arrival test occurring  $j_1$  days after arrival from origin  $i$ , and that are  
 595 reported as travel-related cases on day  $t = t_t + j_1 + t_{rep}$ , as

$$R_i^{rw,1}(t_t + j_1 + t_{rep}) = \sum_{a=0}^{13} t_{sens}(a + j_1) T_i^{rw}(t_t, a), \quad (\text{C13})$$

**Table C7** COVID-19 testing requirements for travellers arriving in Newfoundland and Labrador due to border measures implemented by the Government of Canada or Special Measures Orders issued by Newfoundland and Labrador.

| Dates      | Test policy                                                                                                                                                            |
|------------|------------------------------------------------------------------------------------------------------------------------------------------------------------------------|
| 2020-09-09 | Asymptomatic rotational workers are exempt from the requirement to self-isolate for 14 days if received a negative test between five and seven days after their return |
| 2020-11-25 | Rotational workers required to wait until day seven of their 14 day self-isolation period to arrange COVID-19 testing                                                  |
| 2021-01-07 | Requirement for mandatory negative COVID-19 test result for air passengers entering Canada announced (Federal measure)                                                 |
| 2021-03-12 | Domestic rotational workers can cease self-isolation if testing negative (tested upon return, day 7 and on day 11,12 or 13)                                            |
| 2021-03-27 | Updated rotational worker requirements: must isolate away from families for 14 days, cannot avail test on day 7 or modified self-isolation                             |
| 2021-04-19 | Essential workers entering the province required to self-isolate until they receive their 1st negative test result                                                     |
| 2021-05-15 | COVID-19 Testing order to Individuals arriving in NL (testing requirements during their 14-day self-isolation)                                                         |

596 where  $t_t$  is the date of departure (assumed to be the same day as arrival in NL). To explain Eq. (C13), by the time  
 597 the post-arrival test is completed, the days since exposure  $a$  for the infected traveler at time  $t$  has advanced by  
 598  $j_1$  days from the time of departure  $t_t$ ; furthermore, test results are not reported for another  $t_{rep} = 1$  days, which  
 599 is the assumed delay between taking the test and having the result reported. The exposure date amongst travel-  
 600 related cases is not reported, so we sum across all ages of infection between 0 and 13 days prior to departure. It is  
 601 conventional to write all the time shifts on the right hand side of the equation, however, our presentation of Eq.  
 602 C13 is to make it easier to understand the ‘age of infection’ shift whereby testing occurs  $j_1$  days after arrival.

603 For positive results on the second and third post-arrival tests, occurring  $j_2$  and  $j_3$  days after arrival, but not  
 604 any post-arrival tests prior (i.e., for the third post-arrival test, not testing positive on either the first or second  
 605 post-arrival test) is,

$$R_i^{rw,2}(t_t + j_2 + t_{rep}) = \sum_{a=0}^{13} (1 - t_{sens}(a + j_1)) t_{sens}(a + j_2) T_i^{rw}(t_t, a), \quad (C14)$$

$$R_i^{rw,3}(t_t + j_3 + t_{rep}) = \sum_{a=0}^{13} (1 - t_{sens}(a + j_1)) (1 - t_{sens}(a + j_2)) t_{sens}(a + j_3) T_i^{rw}(t_t, a), \quad (C15)$$

606 where a positive result for the second and third post-arrival tests is reported at times  $t = t_t + j_2 + t_{rep}$  and  
 607  $t = t_t + j_3 + t_{rep}$ , respectively.

608 The number of positive tests for rotational workers is calculated by summing results from all tests that were  
 609 required, i.e.,

$$R_i^{rw}(t) = \sum_k R_i^{rw,k}(t). \quad (C16)$$

610 We do not consider tests for rotational workers based on developing symptoms when at least one post-arrival test  
 611 was mandatory for rotational workers.

## 612 C.2 Travelers that develop symptoms after arrival

613 During the public health emergency, regular travelers arriving in NL were required to self-isolate. Regular travelers  
 614 may have been reported as a travel-related case if they developed symptoms and requested a test. We assume that  
 615 this test occurred  $t_r$  days after symptom onset, and if positive, was reported  $t_{rep} = 1$  day later. Thus, the number  
 616 of regular traveler that are tested because they have symptoms is given by

$$R_i^{r,s}(t_t + t_{rep} + \bar{a} + t_r) = \rho P^S \sum_{a=0}^{13} T_i^r(t_t, a) t_{sens}(a + \bar{a} + t_r), \quad (\text{C17})$$

617 where  $T_i^r(t_t, a)$  is the rate that regular travelers arrive from  $i$  on day  $t_t$  with an infection of age  $a$ ,  $\rho$  is the probability  
 618 that infected travelers have symptomatic infections, and  $P^S$  is the probability that travelers with symptoms request  
 619 a test. The mean time to develop symptoms for arriving travelers is  $\bar{a}$  days after arrival, and the probability of a  
 620 true positive test result  $t_r$  days later is  $t_{sens}(a + \bar{a} + t_r)$ . The mean time to developing symptoms after arrival is  
 621 calculated as,

$$\bar{a} = \sum_{a=0}^{13} \sum_{a_t=0}^{13} a \lambda(a + a_t) p(a_t), \quad (\text{C18})$$

622 where the probability that an arriving traveler has age of infection  $a_t$  is,

$$p(a_t) = \frac{\frac{1}{14} (1 - \rho(1 - \psi) \Lambda(a))}{\sum_{a=0}^{13} \frac{1}{14} (1 - \rho(1 - \psi) \Lambda(a))}. \quad (\text{C19})$$

623 Since we only predict cases each day, and  $t_{sens}(a)$  is a discrete function defined each day,  $\bar{a}$  from Eq. (C18) is  
 624 rounded to the nearest integer before being used in Eq. (C17).

625 The probability of infections of age  $a_t$  amongst arriving travelers is calculated assuming that exposure times for  
 626 travelers are uniformly distributed as 0 to 13 days before departure, and that  $1 - \psi$  travelers that develop symptoms  
 627 before departure do not travel. The average timing of first symptoms after arrival is calculated assuming no pre-  
 628 departure test. As some travelers do not travel due to symptoms, the distribution of ages of infection in arriving  
 629 travelers is skewed right (i.e., the tail is to the right) because more arriving travelers were exposed shortly before  
 630 to departure.

631 The use of  $\bar{a}$  in Eq. (C17) is an approximation because, more exactly, a traveler arriving on day  $t_t$  with infection  
 632 age  $a$  might first show symptoms on any of the days post-arrival (14 possible days). For our model, there are 273  
 633 possible arrival days (September 1, 2020 to May 31, 2021) and 14 possible ages of infection at arrival, which means  
 634 that it is necessary to calculate 3,822 values corresponding to each arrival date and age of infection. If we consider  
 635 that travelers might first develop symptoms on any of the 14 days they are in self-isolation after arrival, then the  
 636 number of calculations necessary increases to 53,508. To reduce the number of calculations needed, we assume that  
 637 all arriving travelers first experience symptoms  $\bar{a}$  days after arrival, where the value of  $\bar{a}$  has some epidemiological  
 638 basis (see Eq. (C18)), but is assumed equal for all travelers irrespective of when they were exposed.

### 639 C.3 Asymptomatic regular travelers

640 Arriving regular travelers with asymptomatic infections could also be detected as travel-related cases because NL  
 641 public health, at times, issued exposure notifications and asked all travelers arriving on particular flights to arrange  
 642 for PCR testing (see Table C8 in Appendix C). As a consequence, such notifications mostly help detect individuals  
 643 infected on the flight rather than prior to departure (i.e., infection age  $a = 0$  at time  $t_t$ ). Therefore, the number of  
 644 arriving regular travelers detected due to exposure notifications is,

$$R_i^{r,e}(t_t + t_r + t_{rep}) = v_i^r(t_t)P_i^A t_{sens}(t_r + t_e), \quad (C20)$$

645 where  $v_i^r(t_t)$  is the volume of regular travelers arriving on day  $t_t$  from origin  $i$ , and  $P_i^A$  is the probability that  
 646 travelers are infected during a flight and comply with the request to complete testing, where it is assumed that  
 647 exposure notifications are issued  $t_e$  days after arrival and travelers are tested  $t_r$  days after requesting a test, such  
 648 that the probability of a positive test result if infected is  $t_{sens}(t_r + t_e)$ . In NL, close contacts of travelers that were  
 649 required to undergo asymptomatic testing were reported as such, and were not included in the number of cases  
 650 reported as travel-related. We consider only regular travelers in the travel volume, as for much of the public health  
 651 emergency in NL, rotational workers were required to complete post-arrival tests (Table C7). Eq. (C20) assumes that  
 652 regular travelers who were exposed on flights were not infected prior to departure. While this is an approximation  
 653 with few exposure notifications it is unlikely that our equations will result in substantial double counting of infected  
 654 individuals because we counted these individuals both as infected during a flight, and infected pre-departure.

**Table C8** Exposure notification from Public Health Advisories in NL during the COVID-19 pandemic where passengers on arriving flights were asked to arrange COVID-19 testing ([Government of Newfoundland Labrador, 2023](#)).

| Date       | Exposure notification to passengers                                                                                                                                                                                                                                                                                                                                                           | Origin                                                                                 | Destination                                                                                  |
|------------|-----------------------------------------------------------------------------------------------------------------------------------------------------------------------------------------------------------------------------------------------------------------------------------------------------------------------------------------------------------------------------------------------|----------------------------------------------------------------------------------------|----------------------------------------------------------------------------------------------|
| 2020-09-27 | WestJet Flights 306 arrived on Monday, September 21<br>WestJet Flights 328 arrived on Monday, September 21                                                                                                                                                                                                                                                                                    | Winnipeg, MB<br>Toronto, ON                                                            | St. John's, NL<br>St. John's, NL                                                             |
| 2020-10-05 | Air Canada Flight AC604 arrived on Wednesday, September 30<br>Air Canada Flight AC8876 arrived on Wednesday, September 30                                                                                                                                                                                                                                                                     | Toronto, ON<br>Halifax, NS                                                             | Halifax, NS<br>Deer Lake, NL                                                                 |
| 2020-10-23 | Air Canada Flight 7484 arrived on Monday, October 12                                                                                                                                                                                                                                                                                                                                          | Toronto, ON                                                                            | Deer Lake, NL                                                                                |
| 2020-11-04 | Air Canada Flight 7484 arrived on Friday, October 30                                                                                                                                                                                                                                                                                                                                          | Toronto, ON                                                                            | Deer Lake, NL                                                                                |
| 2020-11-23 | Air Canada Flight 8880 arrived on Thursday, November 19                                                                                                                                                                                                                                                                                                                                       | Halifax, NS                                                                            | Deer Lake, NL                                                                                |
| 2020-11-24 | People who returned to NL from Nova Scotia in the last two weeks, and who visited bars in Halifax and surrounding metro communities                                                                                                                                                                                                                                                           | NS                                                                                     | NL                                                                                           |
| 2020-12-04 | WestJet Flight 3428 arrived on Thursday, November 26                                                                                                                                                                                                                                                                                                                                          | Halifax, NS                                                                            | St. John's, NL                                                                               |
| 2020-12-20 | Several flight advisories this weekend:<br>Air Canada Flight 8862 arrived on Monday, December 7<br>Air Canada Flight 690 arrived on Friday, December 11<br>Air Canada Flight 8862 arrived on Friday, December 11<br>Air Canada Flight 8862 arrived on Tuesday, December 15<br>Air Canada Flight 690 arrived on Tuesday, December 15<br>Air Canada Flight 690 arrived on Thursday, December 17 | Halifax, NS<br>Toronto, ON<br>Halifax, NS<br>Halifax, NS<br>Toronto, ON<br>Toronto, ON | Gander, NL<br>St. John's, NL<br>Gander, NL<br>Gander, NL<br>St. John's, NL<br>St. John's, NL |
| 2020-12-29 | Air Canada Flight 8880 arrived on Tuesday, December 22                                                                                                                                                                                                                                                                                                                                        | Halifax, NS                                                                            | Deer Lake, NL                                                                                |
| 2021-01-20 | Who traveled on the MV Blue Puttees to and from North Sydney, Nova Scotia, and Port Aux Basques between Tuesday, December 29 and Saturday, January 16                                                                                                                                                                                                                                         | Sydney, NS                                                                             | Port Aux Basques, NL                                                                         |
| 2021-02-15 | Air Canada Flight 7484 arrived on Thursday, February 11,                                                                                                                                                                                                                                                                                                                                      | Toronto, ON                                                                            | Deer Lake, NL                                                                                |
| 2021-03-04 | Air Canada Flight 8996 arrived on Thursday, February 25                                                                                                                                                                                                                                                                                                                                       | Halifax, NS                                                                            | St. John's, NL                                                                               |
| 2021-04-19 | Air Canada Flight 8008 arrived on Monday, April 13                                                                                                                                                                                                                                                                                                                                            | Toronto, ON                                                                            | Deer Lake, NL                                                                                |
| 2021-05-02 | Air Canada Flight 8016 arrived on Friday, April 30                                                                                                                                                                                                                                                                                                                                            | Montreal, QC                                                                           | St. John's, NL                                                                               |
| 2021-05-06 | Air Canada Flight 7540 arrived on Tuesday, May 4                                                                                                                                                                                                                                                                                                                                              | Toronto, ON                                                                            | Deer Lake, NL                                                                                |
| 2021-05-11 | Air Canada Flight 7542 arrived on Monday, May 10                                                                                                                                                                                                                                                                                                                                              | Toronto, ON                                                                            | Deer Lake, NL                                                                                |

## 655 Appendix D Reported travel-related cases

656 The predictions of the epidemiological model are compared with the number of travel-related cases reported as  
 657 originating from Canada or internationally. These data are also the response variables for statistical models. For  
 658 travelers from international origins,

$$R_{\text{INT}}(t) = R_{\text{INT}}^{r,e}(t) + R_{\text{INT}}^{r,s}(t), \quad (\text{D21})$$

659 and for travelers from Canadian origins,

$$R_{\text{CA}}(t) = \sum_i R_i^{r,e}(t) + R_i^{rw}(t) + R_i^{r,s}(t), \quad (\text{D22})$$

660 where the sum  $i$  is across all Canadian provinces and territories. An overview of the model and summary of  
 661 parameters is given in Figure 1 and Tables B6.

## 662 Appendix E Model selection

663 Figure 4C and D show the predictions of the best models (Canada: Model 1 and International: Model 1; Table  
 664 2) and the epidemiological models (Canada: Model 7 and International: Model 4) where model predictions and  
 665 travel-related cases are shown as their monthly values. Figure E2 shows the same information using daily values.

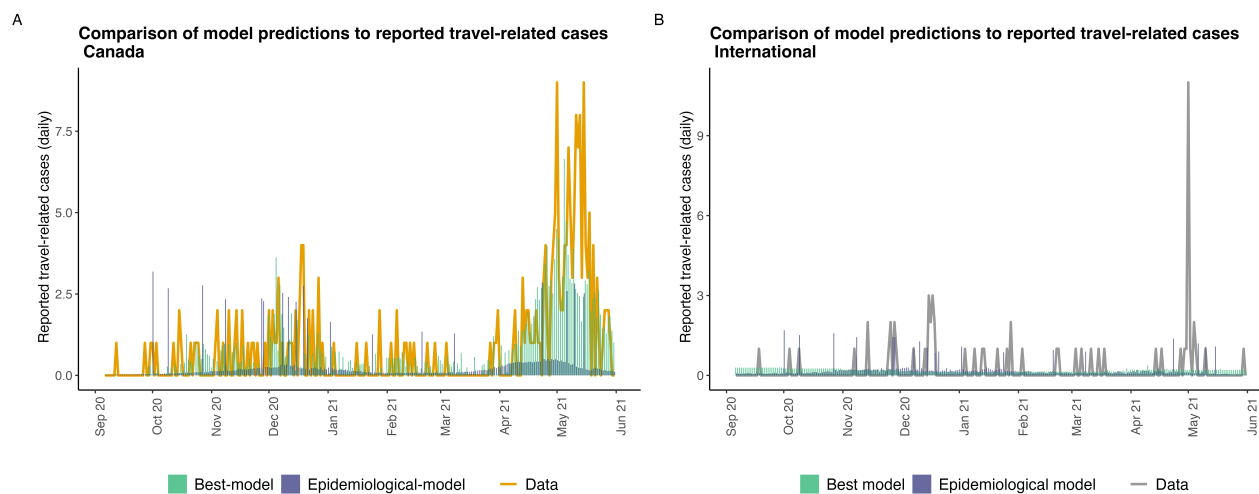

**Fig. E2** Predicted reported travel-related cases arriving in NL (daily) for the epidemiological model (blue bars) and the best model (green bars; see Table 2) for travelers originating from (A) Canadian and (B) international origins. In both A and B, daily travel-related cases reported in NL are shown with lines.

## 666 Appendix [References]

667 Aleman DM, Tham BZ, Wagner SJ, et al (2021) How effective was Newfoundland & Labrador’s travel ban to  
 668 prevent the spread of COVID-19? An agent-based analysis. medRxiv

669 Amendment No. 6 (2020) Government of Newfoundland Labrador, Health and Community Services, URL <https://www.gov.nl.ca/covid-19/files/Special-Measures-Order-Amendment-No.-6-April-23-2020.pdf>, [April 23, 2020]  
 670

- 671 Amendment No. 8 (2020) Government of Newfoundland Labrador, Health and Community Services, URL <https://www.gov.nl.ca/covid-19/files/Special-Measures-Order-Amendment-No.-8-April-25-2020.pdf>, [April 25, 2020]  
672
- 673 Amendment No.11 (2020) Government of Newfoundland Labrador, Health and Community Services, URL <https://www.gov.nl.ca/covid-19/files/Special-Measures-Order-Amendment-No.-11-April-29-2020.pdf>, [April 29, 2020]  
674
- 675 Atlantic Travel Amendments (2020) Government of Newfoundland Labrador, Health and Community Services,  
676 URL <https://www.gov.nl.ca/covid-19/files/Special-Measures-Order-Atlantic-Travel-Amendments-July-3-2020.pdf>, [July 3, 2020]  
677
- 678 Blood Donation Organizations (2023) The COVID-19 Immunity Task Force, Seroprevalence in Canada by province  
679 over time, URL <https://www.covid19immunitytaskforce.ca/seroprevalence-in-canada/>, [Updated on: February  
680 14, 2023]
- 681 Canadian Institute for Health Information (2022) Canadian COVID-19 Intervention Timeline, URL <https://www.cihi.ca/en/canadian-covid-19-intervention-timeline>, [Updated: October 13, 2022]  
682
- 683 Centers for Disease Control and Prevention (2020-2021) Nationwide covid-19 infection- and vaccination-  
684 induced antibody seroprevalence (blood donations), URL [https://covid.cdc.gov/covid-data-tracker/  
685 #nationwide-blood-donor-seroprevalence](https://covid.cdc.gov/covid-data-tracker/#nationwide-blood-donor-seroprevalence), [Updated on: February 18, 2022]
- 686 Declaration Exemption Order (2020) Government of Newfoundland Labrador, Health and Community Services,  
687 URL <https://www.gov.nl.ca/covid-19/files/Declaration-Exemption-Order-May-16-2020.pdf>, [May 16, 2020]
- 688 Dong E, Du H, Gardner L (2020) An interactive web-based dashboard to track COVID-19 in real time. *The Lancet  
689 Infectious Diseases* 20(5):533–534
- 690 Exemption Order (2020) Government of Newfoundland Labrador, Health and Community Services, URL [https://  
691 www.gov.nl.ca/covid-19/files/Special-Measures-Order-Exemption-Order-March-20-2020.pdf](https://www.gov.nl.ca/covid-19/files/Special-Measures-Order-Exemption-Order-March-20-2020.pdf), [March 20, 2020]
- 692 Exemption Order 2 (2020) Government of Newfoundland Labrador, Health and Community Services, URL [https://  
693 www.gov.nl.ca/covid-19/files/Exemption-Order-March-21-2020-new.pdf](https://www.gov.nl.ca/covid-19/files/Exemption-Order-March-21-2020-new.pdf), [March 21, 2020]
- 694 Godin A, Xia Y, Buckeridge DL, et al (2021) The role of case importation in explaining differences in early SARS-  
695 CoV-2 transmission dynamics in Canada—A mathematical modeling study of surveillance data. *International  
696 Journal of Infectious Diseases* 102:254–259
- 697 Government of Canada (2020) New pre-departure COVID-19 testing requirements come into effect for  
698 all air travellers flying into Canada, URL [https://www.canada.ca/en/transport-canada/news/2021/01/  
699 new-pre-departure-covid-19-testing-requirements-come-into-effect-for-all-air-travellers-flying-into-canada.htm](https://www.canada.ca/en/transport-canada/news/2021/01/new-pre-departure-covid-19-testing-requirements-come-into-effect-for-all-air-travellers-flying-into-canada.htm),  
700 [January 6, 2021]
- 701 Government of Newfoundland and Labrador (2020-2021) Department of Tourism, Culture, Arts and Recreation,  
702 URL <https://www.gov.nl.ca/tcar/tourism-division/visitor-and-market-insights/>
- 703 Government of Newfoundland Labrador (2016) Tourism, Culture, Arts and Recreation. 2016 EXIT SURVEY PRO-  
704 FILE OF VACATION VISITORS FROM CANADA, URL [https://www.gov.nl.ca/tcar/files/5\\_Vacation\\_Visitor\\_  
705 Profile\\_Canadians.pdf](https://www.gov.nl.ca/tcar/files/5_Vacation_Visitor_Profile_Canadians.pdf)
- 706 Government of Newfoundland Labrador (2017) Tourism, Culture, Arts and Recreation, THE SHOULDER SEASON  
707 VISITOR, A profile of spring and fall visitors to Newfoundland and Labrador, URL [https://www.gov.nl.ca/tcar/  
708 files/7\\_Shoulder\\_Season\\_Vacation\\_Travellers\\_-\\_Infographic.pdf](https://www.gov.nl.ca/tcar/files/7_Shoulder_Season_Vacation_Travellers_-_Infographic.pdf)
- 709 Government of Newfoundland Labrador (2018a) Department of Tourism, Culture, Arts and Recreation, Newfound-  
710 land and Labrador Provincial Tourism Performance 2018, URL [www.gov.nl.ca/tcar/files/Annual\\_Performance\\_  
711 Report\\_2018\\_Final\\_June\\_-2019.pdf](http://www.gov.nl.ca/tcar/files/Annual_Performance_Report_2018_Final_June_-2019.pdf)



- 712 Government of Newfoundland Labrador (2018b) Tourism, Culture, Arts and Recreation. 2016 EXIT SUR-  
713 VEY – Result Highlights, URL [https://www.gov.nl.ca/tcar/files/2016\\_Exit\\_Survey\\_Highlights\\_Report\\_FINAL-](https://www.gov.nl.ca/tcar/files/2016_Exit_Survey_Highlights_Report_FINAL_REVISED_June_2018.pdf)  
714 [REVISED\\_June\\_2018.pdf](https://www.gov.nl.ca/tcar/files/2016_Exit_Survey_Highlights_Report_FINAL_REVISED_June_2018.pdf), [Updated June 2018]
- 715 Government of Newfoundland Labrador (2023) Health and Community Services, URL [https://www.gov.nl.ca/](https://www.gov.nl.ca/releases/category/health/)  
716 [releases/category/health/](https://www.gov.nl.ca/releases/category/health/), [Updated on: April 11, 2023]
- 717 Hart WS, Maini PK, Thompson RN (2021) High infectiousness immediately before COVID-19 symptom onset  
718 highlights the importance of continued contact tracing. *elife* 10:e65534
- 719 Hellewell J, Russell TW, Beale R, et al (2021) Estimating the effectiveness of routine asymptomatic PCR testing  
720 at different frequencies for the detection of SARS-CoV-2 infections. *BMC medicine* 19(1):1–10
- 721 Hendy S, Steyn N, James A, et al (2021) Mathematical modelling to inform New Zealand’s COVID-19 response.  
722 *Journal of the Royal Society of New Zealand* 51(sup1):S86–S106
- 723 Hewitt CM, Haan M, Neis B (2018) Interprovincial employees from Newfoundland and Labrador, 2005-2014.  
724 Memorial University of Newfoundland
- 725 Hurford A, Martignoni MM, Loredó-Osti JC, et al (2023) Pandemic modelling for regions implementing an  
726 elimination strategy. *Journal of Theoretical Biology* 561:111378
- 727 International Air Transport Association (2020) Economic performance of the airline industry, URL [https://www.](https://www.iata.org)  
728 [iata.org](https://www.iata.org)
- 729 Labrador-Quebec Border Amendments (2020) Government of Newfoundland Labrador, Health  
730 and Community Services, Special Measures Order, URL [https://www.gov.nl.ca/covid-19/files/](https://www.gov.nl.ca/covid-19/files/Special-Measures-Order-Labrador-Quebec-Border-Amendments-June-26-2020.pdf)  
731 [Special-Measures-Order-Labrador-Quebec-Border-Amendments-June-26-2020.pdf](https://www.gov.nl.ca/covid-19/files/Special-Measures-Order-Labrador-Quebec-Border-Amendments-June-26-2020.pdf), [June 25, 2020]
- 732 Lauer SA, Grantz KH, Bi Q, et al (2020) The incubation period of coronavirus disease 2019 (COVID-19) from  
733 publicly reported confirmed cases: estimation and application. *Annals of internal medicine* 172(9):577–582
- 734 Lou B, Li TD, Zheng SF, et al (2020) Serology characteristics of SARS-CoV-2 infection after exposure and post-  
735 symptom onset. *European Respiratory Journal* 56(2)
- 736 Martignoni MM, Rahman P, Hurford A (2022) Rotational worker vaccination provides indirect protection to vul-  
737 nerable groups in regions with low COVID-19 prevalence. *AIMS Mathematics* 7:3988–4003. URL [doi:10.3934/](https://doi.org/10.3934/math.2022220)  
738 [math.2022220](https://doi.org/10.3934/math.2022220)
- 739 Martignoni MM, Mohammadi Z, Loredó-Osti J, et al (2023) Extensive SARS-CoV-2 testing reveals BA.1/BA.2  
740 asymptomatic rates and underreporting in school children. *Can Commun Dis Rep* 49:155–65. URL [https://doi.](https://doi.org/10.14745/ccdr.v49i04a08)  
741 [org/10.14745/ccdr.v49i04a08](https://doi.org/10.14745/ccdr.v49i04a08)
- 742 Public Health Infobase (2020-2021) Public Health Agency of Canada, Coronavirus disease (COVID-19), URL  
743 <https://open.canada.ca/data/en/dataset/261c32ab-4cfd-4f81-9dea-7b64065690dc>, [Released January 2020]
- 744 Re-Opening - Travel (2021) Government of Newfoundland Labrador, Health and Community Services, URL [https:](https://www.gov.nl.ca/covid-19/files/Special-Measures-Order-Re-opening-Travel-July-1-2021.pdf)  
745 [//www.gov.nl.ca/covid-19/files/Special-Measures-Order-Re-opening-Travel-July-1-2021.pdf](https://www.gov.nl.ca/covid-19/files/Special-Measures-Order-Re-opening-Travel-July-1-2021.pdf), [July 1, 2021]
- 746 Self-Isolation Exemption Order (2020) Government of Newfoundland Labrador, Health and Community Services,  
747 URL <https://www.gov.nl.ca/covid-19/files/Self-Isolation-Exemption-Order-May-16-2020.pdf>, [May 16, 2020]
- 748 Smith LE, Amlôt R, Lambert H, et al (2020) Factors associated with adherence to self-isolation and lockdown  
749 measures in the UK: a cross-sectional survey. *Public Health* 187:41–52



- 750 Statistics Canada (2020-2021) Frontier counts, URL [https://www23.statcan.gc.ca/imdb/p2SV.pl?Function=](https://www23.statcan.gc.ca/imdb/p2SV.pl?Function=getSurvey&SDDS=5005)  
751 [getSurvey&SDDS=5005](https://www23.statcan.gc.ca/imdb/p2SV.pl?Function=getSurvey&SDDS=5005), [Updated on: March 13, 2023]
- 752 Statistics Canada (2021) Census Profile, 2021 Census of Population, URL [https://www12.statcan.gc.ca/](https://www12.statcan.gc.ca/census-recensement/2021/dp-pd/prof/index.cfm?Lang=E)  
753 [census-recensement/2021/dp-pd/prof/index.cfm?Lang=E](https://www12.statcan.gc.ca/census-recensement/2021/dp-pd/prof/index.cfm?Lang=E), [Updated on: March 29, 2023]
- 754 The United States government (2021) United States Census Bureau, U.S. and World Population Clock, URL  
755 <https://www.census.gov/popclock/>, [Reported: December 31, 2021]
- 756 Travel Exemption Order (2020) Government of Newfoundland Labrador, Health and Community Services, URL  
757 <https://www.gov.nl.ca/covid-19/files/Travel-Exemption-Order.pdf>, [May 5, 2020]
- 758 Traveler COVID-19 Testing (2021) Government of Newfoundland Labrador, Health and  
759 Community Services, Special Measures Order, URL [https://www.gov.nl.ca/covid-19/files/](https://www.gov.nl.ca/covid-19/files/Special-Measures-Order-Traveller-COVID-19-Testing-May-15-2021.pdf)  
760 [Special-Measures-Order-Traveller-COVID-19-Testing-May-15-2021.pdf](https://www.gov.nl.ca/covid-19/files/Special-Measures-Order-Traveller-COVID-19-Testing-May-15-2021.pdf), [May 15, 2021]
- 761 Trudeau J (2020) Prime Minister announces new actions under Canada's  
762 COVID-19 response, URL [https://pm.gc.ca/en/news/news-releases/2020/03/16/](https://pm.gc.ca/en/news/news-releases/2020/03/16/prime-minister-announces-new-actions-under-canadas-covid-19-response)  
763 [prime-minister-announces-new-actions-under-canadas-covid-19-response](https://pm.gc.ca/en/news/news-releases/2020/03/16/prime-minister-announces-new-actions-under-canadas-covid-19-response), [March 16, 2020]
